# Supplementary material for: Long-Term Wetland Monitoring Using the Landsat Archive: A Review
Source: MDPI journal article supplement (doi:10.3390/rs15030820), 2023-01-31
Supplement: s1 [file s1]

Archive with 4 entries (4 files):
- Supplementary_Table_S1.pdf
- Supplementary_Table_S2.pdf
- Supplementary_Table_S3.pdf
- Supplementary_Table_S4.pdf
