# Supplementary material for: Long-Term Wetland Monitoring Using the Landsat Archive: A Review
Source: MDPI journal article supplement (doi:10.3390/rs15030820), 2023-01-31
Supplement: s1 [file s1 › Supplementary_Table_S1.pdf]

**Table S1.** Keywords selected per topic for the literature search. An asterisk (\*) was used to retrieve variations of a term.

| Topics                  |             |             |
|-------------------------|-------------|-------------|
| Landsat                 | Monitoring  | Wetlands    |
| ----- AND -----         |             |             |
| Landsat*                | Change      | Marsh*      |
| L4 TM                   | Long term   | Wet*        |
| L5 TM                   | Monitor*    | Lagoon*     |
| L7 ETM+                 | Decadal     | Moor*       |
| L8 OLI                  | Century     | Bog*        |
| L1 MSS                  | Historical  | Floodplain* |
| L8 TIRS                 | Trajector*  | Swamp*      |
| Thematic Mapper         | Trend*      | Mire*       |
| Operational Land Imager | Decade      | Fen*        |
| Thermal Infrared Sensor | Long-term   | Palustrine* |
| Multispectral Scanner   | 197* - 199* | Lacustrine* |
|                         | 197* - 200* | Riverine*   |
|                         | 197* - 201* | Reedbed*    |
|                         | 197* - 202* | Saltmarsh*  |
|                         | 198* - 200* | Peatland*   |
|                         | 198* - 201* | Wetland*    |
|                         | 198* - 202* | RAMSAR      |
|                         | 199* - 201* | Mangrove*   |
|                         | 199* - 202* |             |
|                         | 200* - 202* |             |

OR
