# Supplementary material for: Long-Term Wetland Monitoring Using the Landsat Archive: A Review
Source: MDPI journal article supplement (doi:10.3390/rs15030820), 2023-01-31
Supplement: s1 [file s1 › Supplementary_Table_S2.pdf]

**Table S2.** Full list of reviewed articles. Although several references cited below are present in the manuscript, the following numbers do not match those provided in the manuscript.

1. Abdul Aziz, A.; Phinn, S.; Dargusch, P.; Omar, H.; Arjasakusuma, S. Assessing the Potential Applications of Landsat Image Archive in the Ecological Monitoring and Management of a Production Mangrove Forest in Malaysia. *Wetlands Ecol Manage* **2015**, *23*, 1049–1066, doi:10.1007/s11273-015-9443-1.
2. Ablat, X.; Liu, G.; Liu, Q.; Huang, C. Application of Landsat Derived Indices and Hydrological Alteration Matrices to Quantify the Response of Floodplain Wetlands to River Hydrology in Arid Regions Based on Different Dam Operation Strategies. *Science of The Total Environment* **2019**, *688*, 1389–1404, doi:10.1016/j.scitotenv.2019.06.232.
3. Ahmed, M.H.; El Leithy, B.M.; Thompson, J.R.; Flower, R.J.; Ramdani, M.; Ayache, F.; Hassan, S.M. Application of Remote Sensing to Site Characterisation and Environmental Change Analysis of North African Coastal Lagoons. *Hydrobiologia* **2009**, *622*, 147–171, doi:10.1007/s10750-008-9682-8.
4. Alademomi, A.S.; Okolie, C.J.; Daramola, O.E.; Agboola, R.O.; Salami, T.J. Assessing the Relationship of LST, NDVI and EVI with Land Cover Changes in the Lagos Lagoon Environment. *Quaestiones Geographicae* **2020**, *39*, 87–109.
5. Albhaisi, M.; Brendonck, L.; Batelaan, O. Predicted Impacts of Land Use Change on Groundwater Recharge of the Upper Berg Catchment, South Africa. *Water SA* **2013**, *39*, 211–220, doi:10.4314/wsa.v39i2.4.
6. Aljahdali, M.O.; Munawar, S.; Khan, W.R. Monitoring Mangrove Forest Degradation and Regeneration: Landsat Time Series Analysis of Moisture and Vegetation Indices at Rabigh Lagoon, Red Sea. *Forests* **2021**, *12*, 52.
7. Allen, Y.C.; Couvillion, B.R.; Barras, J.A. Using Multitemporal Remote Sensing Imagery and Inundation Measures to Improve Land Change Estimates in Coastal Wetlands. *Estuaries and Coasts* **2012**, *35*, 190–200, doi:10.1007/s12237-011-9437-z.
8. Almahasheer, H.; Aljowair, A.; Duarte, C.M.; Irigoien, X. Decadal Stability of Red Sea Mangroves. *Estuarine, Coastal and Shelf Science* **2016**, *169*, 164–172, doi:10.1016/j.ecss.2015.11.027.
9. Alphan, H. Classifying Land Cover Conversions in Coastal Wetlands in the Mediterranean: Pairwise Comparisons of Landsat Images. *Land Degradation & Development* **2012**, *23*, 278–292, doi:10.1002/ldr.1080.
10. Alphan, H. Comparing the Utility of Image Algebra Operations for Characterizing Landscape Changes: The Case of the Mediterranean Coast. *Journal of Environmental Management* **2011**, *92*, 2961–2971, doi:10.1016/j.jenvman.2011.07.009.
11. Amani, M.; Mahdavi, S.; Kakooei, M.; Ghorbanian, A.; Brisco, B.; DeLancey, E.R.; Toure, S.; Reyes, E.L. Wetland Change Analysis in Alberta, Canada Using Four Decades of Landsat Imagery. *IEEE Journal of Selected Topics in Applied Earth Observations and Remote Sensing* **2021**, *14*, 10314–10335.
12. Andrieu, J. Land Cover Changes on the West-African Coastline from the Saloum Delta (Senegal) to Rio Geba (Guinea-Bissau) between 1979 and 2015. *European Journal of Remote Sensing* **2018**, *51*, 314–325, doi:10.1080/22797254.2018.1432295.
13. Anwar, Md.S.; Takewaka, S. Analyses on Phenological and Morphological Variations of Mangrove Forests along the Southwest Coast of Bangladesh. *J Coast Conserv* **2014**, *18*, 339–357, doi:10.1007/s11852-014-0321-4.
14. Asbridge, E.; Lucas, R.M. Mangrove Response to Environmental Change in Kakadu National Park. *IEEE Journal of Selected Topics in Applied Earth Observations and Remote Sensing* **2016**, *9*, 5612–5620, doi:10.1109/JSTARS.2016.2616449.

15. Asbridge, E.; Lucas, R.; Rogers, K.; Accad, A. The Extent of Mangrove Change and Potential for Recovery Following Severe Tropical Cyclone Yasi, Hinchinbrook Island, Queensland, Australia. *Ecol Evol* **2018**, *8*, 10416–10434, doi:10.1002/ece3.4485.
16. Asbridge, E.; Lucas, R.; Ticehurst, C.; Bunting, P. Mangrove Response to Environmental Change in Australia's Gulf of Carpentaria. *Ecology and Evolution* **2016**, *6*, 3523–3539, doi:10.1002/ece3.2140.
17. Ashok, A.; Rani, H.P.; Jayakumar, K.V. Monitoring of Dynamic Wetland Changes Using NDVI and NDWI Based Landsat Imagery. *Remote Sensing Applications: Society and Environment* **2021**, *23*, 100547, doi:10.1016/j.rsase.2021.100547.
18. Ashournejad, Q.; Amiraslani, F.; Moghadam, M.K.; Toomanian, A. Assessing the Changes of Mangrove Ecosystem Services Value in the Pars Special Economic Energy Zone. *Ocean & Coastal Management* **2019**, *179*, 104838, doi:10.1016/j.ocecoaman.2019.104838.
19. Avtar, R.; Navia, M.; Sassen, J.; Fujii, M. Impacts of Changes in Mangrove Ecosystems in the Ba and Rewa Deltas, Fiji Using Multi-Temporal Landsat Data and Social Survey. *Coastal Engineering Journal* **2021**, *63*, 386–407, doi:10.1080/21664250.2021.1932332.
20. Bacani, V.M.; Sakamoto, A.Y.; Quérol, H.; Vannier, C.; Corgne, S. Markov Chains–Cellular Automata Modeling and Multicriteria Analysis of Land Cover Change in the Lower Nhecolândia Subregion of the Brazilian Pantanal Wetland. *JARS* **2016**, *10*, 016004, doi:10.1117/1.JRS.10.016004.
21. Banerjee, B.P.; Raval, S.; Timms, W. Evaluation of Rainfall and Wetland Water Area Variability at Thirlmere Lakes Using Landsat Time-Series Data. *Int. J. Environ. Sci. Technol.* **2016**, *13*, 1781–1792, doi:10.1007/s13762-016-1018-z.
22. Barik, K.K.; Mitra, D.; Annadurai, R.; Tripathy, J.K.; Nanda, S. Geospatial Analysis of Coastal Environment: A Case Study on Bhitarkanika Mangroves, East Coast of India. *IJMS Vol.45(04) [April 2016]* **2016**.
23. Basumatary, H.; Sah, R.K.; Das, A.K. Analyzing Area Dynamics on a Protected Floodplain Using Long-Term Sequential Data: The Case of Kaziranga National Park. *J Indian Soc Remote Sens* **2019**, *47*, 1557–1566, doi:10.1007/s12524-019-01000-x.
24. Behling, R.; Milewski, R.; Chabrillat, S. Spatiotemporal Shoreline Dynamics of Namibian Coastal Lagoons Derived by a Dense Remote Sensing Time Series Approach. *International Journal of Applied Earth Observation and Geoinformation* **2018**, *68*, 262–271, doi:10.1016/j.jag.2018.01.009.
25. Berberoğlu, S.; Akin, A.; Atkinson, P.M.; Curran, P.J. Utilizing Image Texture to Detect Land-Cover Change in Mediterranean Coastal Wetlands. *International Journal of Remote Sensing* **2010**, *31*, 2793–2815, doi:10.1080/01431160903111077.
26. Berhane, T.; Lane, C.; Mengistu, S.; Christensen, J.; Golden, H.; Qiu, S.; Zhu, Z.; Wu, Q. Land-Cover Changes to Surface-Water Buffers in the Midwestern USA: 25 Years of Landsat Data Analyses (1993–2017). *Remote Sensing* **2020**, *12*, 754, doi:10.3390/rs12050754.
27. Bhattacharjee, S.; Islam, M.T.; Kabir, M.E.; Kabir, M.M. Land-Use and Land-Cover Change Detection in a North-Eastern Wetland Ecosystem of Bangladesh Using Remote Sensing and GIS Techniques. *Earth Syst Environ* **2021**, *5*, 319–340, doi:10.1007/s41748-021-00228-3.
28. Bianchi, L.O.; Rivera, J.A.; Rojas, F.; Britos Navarro, M.; Villalba, R. A Regional Water Balance Indicator Inferred from Satellite Images of an Andean Endorheic Basin in Central-Western Argentina. *Hydrological Sciences Journal* **2017**, *62*, 533–545, doi:10.1080/02626667.2016.1247210.
29. Bishop-Taylor, R.; Tulbure, M.G.; Broich, M. Surface-water Dynamics and Land Use Influence Landscape Connectivity across a Major Dryland Region. *Ecol Appl* **2017**, *27*, 1124–1137, doi:10.1002/eap.1507.

30. Blanchette, M.; Rousseau, A.N.; Poulin, M. Mapping Wetlands and Land Cover Change with Landsat Archives: The Added Value of Geomorphologic Data: Cartographie de La Dynamique Spatio-Temporelle Des Milieux Humides à Partir d'archives Landsat: La Valeur Ajoutée de Données Géomorphologiques. *Canadian Journal of Remote Sensing* **2018**, *44*, 337–356.
31. Borro, M.; Morandeira, N.; Salvia, M.; Minotti, P.; Perna, P.; Kandus, P. Mapping Shallow Lakes in a Large South American Floodplain: A Frequency Approach on Multitemporal Landsat TM/ETM Data. *Journal of Hydrology* **2014**, *512*, 39–52, doi:10.1016/j.jhydrol.2014.02.057.
32. Brasil, M.C.O.; de Magalhães Filho, R.; do Espírito-Santo, M.M.; Leite, M.E.; Veloso, M. das D.M.; Falcão, L.A.D. Land-Cover Changes and Drivers of Palm Swamp Degradation in Southeastern Brazil from 1984 to 2018. *Applied Geography* **2021**, *137*, 102604.
33. Broich, M.; Tulpure, M.G.; Verbesselt, J.; Xin, Q.; Wearne, J. Quantifying Australia's Dryland Vegetation Response to Flooding and Drought at Sub-Continental Scale. *Remote Sensing of Environment* **2018**, *212*, 60–78, doi:10.1016/j.rse.2018.04.032.
34. Brooke, B.; Lymburner, L.; Lewis, A. Coastal Dynamics of Northern Australia – Insights from the Landsat Data Cube. *Remote Sensing Applications: Society and Environment* **2017**, *8*, 94–98, doi:10.1016/j.rsase.2017.08.003.
35. Buitre, M.; Zhang, H.; Lin, H. The Mangrove Forests Change and Impacts from Tropical Cyclones in the Philippines Using Time Series Satellite Imagery. *Remote Sensing* **2019**, *11*, 688, doi:10.3390/rs11060688.
36. Cai, X.; Haile, A.T.; Magidi, J.; Mapedza, E.; Nhamo, L. Living with Floods – Household Perception and Satellite Observations in the Barotse Floodplain, Zambia. *Physics and Chemistry of the Earth, Parts A/B/C* **2017**, *100*, 278–286, doi:10.1016/j.pce.2016.10.011.
37. Cai, Y.-B.; Zhang, H.; Pan, W.-B.; Chen, Y.-H.; Wang, X.-R. Land Use Pattern, Socio-Economic Development, and Assessment of Their Impacts on Ecosystem Service Value: Study on Natural Wetlands Distribution Area (NWDA) in Fuzhou City, Southeastern China. *Environ Monit Assess* **2013**, *185*, 5111–5123, doi:10.1007/s10661-012-2929-x.
38. Cai, Y.; Zhang, H.; Pan, W.; Chen, Y.; Wang, X. Urban Expansion and Its Influencing Factors in Natural Wetland Distribution Area in Fuzhou City, China. *Chin. Geogr. Sci.* **2012**, *22*, 568–577, doi:10.1007/s11769-012-0564-7.
39. Cai, Y.; Zhang, H.; Zheng, P.; Pan, W. Quantifying the Impact of Land Use/Land Cover Changes on the Urban Heat Island: A Case Study of the Natural Wetlands Distribution Area of Fuzhou City, China. *Wetlands* **2016**, *36*, 285–298, doi:10.1007/s13157-016-0738-7.
40. Camilleri, S.; De Giglio, M.; Stecchi, F.; Pérez-Hurtado, A. Land Use and Land Cover Change Analysis in Predominantly Man-Made Coastal Wetlands: Towards a Methodological Framework. *Wetlands Ecol Manage* **2017**, *25*, 23–43, doi:10.1007/s11273-016-9500-4.
41. Campbell, T.; Lantz, T.; Fraser, R. Impacts of Climate Change and Intensive Lesser Snow Goose (*Caerulescens Caerulescens*) Activity on Surface Water in High Arctic Pond Complexes. *Remote Sensing* **2018**, *10*, 1892, doi:10.3390/rs10121892.
42. Carle, M.V.; Sasser, C.E. Productivity and Resilience: Long-Term Trends and Storm-Driven Fluctuations in the Plant Community of the Accreting Wax Lake Delta. *Estuaries and coasts* **2016**.
43. Carney, J.; Gillespie, T.W.; Rosomoff, R. Assessing Forest Change in a Priority West African Mangrove Ecosystem: 1986–2010. *Geoforum* **2014**, *53*, 126–135, doi:10.1016/j.geoforum.2014.02.013.
44. Castillo, Y.B.; Kim, K.; Kim, H.S. Thirty-Two Years of Mangrove Forest Land Cover Change in Parita Bay, Panama. *Forest Science and Technology* **2021**, 1–13, doi:10.1080/21580103.2021.1922512.

45. Cavanaugh, K.C.; Osland, M.J.; Bardou, R.; Hinojosa-Arango, G.; López-Vivas, J.M.; Parker, J.D.; Rovai, A.S.; Morueta-Holme, N. Sensitivity of Mangrove Range Limits to Climate Variability. *Global Ecol Biogeogr* **2018**, *27*, 925–935, doi:10.1111/geb.12751.
46. Cetin, M. A Satellite Based Assessment of the Impact of Urban Expansion around a Lagoon. *International Journal of Environmental Science and Technology* **2009**, *4*, 579–590, doi:10.1007/BF03326098.
47. Charters, L.J.; Aplin, P.; Marston, C.G.; Padfield, R.; Rengasamy, N.; Bin Dahalan, M.P.; Evers, S. Peat Swamp Forest Conservation Withstands Pervasive Land Conversion to Oil Palm Plantation in North Selangor, Malaysia. *International Journal of Remote Sensing* **2019**, *40*, 7409–7438, doi:10.1080/01431161.2019.1574996.
48. Chen, C.-F.; Son, N.-T.; Chang, N.-B.; Chen, C.-R.; Chang, L.-Y.; Valdez, M.; Centeno, G.; Thompson, C.A.; Aceituno, J.L. Multi-Decadal Mangrove Forest Change Detection and Prediction in Honduras, Central America, with Landsat Imagery and a Markov Chain Model. *Remote Sensing* **2013**, *5*, 6408–6426, doi:10.3390/rs5126408.
49. Chen, Y.; Dong, J.; Xiao, X.; Ma, Z.; Tan, K.; Melville, D.; Li, B.; Lu, H.; Liu, J.; Liu, F. Effects of Reclamation and Natural Changes on Coastal Wetlands Bordering China's Yellow Sea from 1984 to 2015. *Land Degrad Dev* **2019**, *30*, 1533–1544, doi:10.1002/ldr.3322.
50. Cherrington, E.A.; Griffin, R.E.; Anderson, E.R.; Hernandez Sandoval, B.E.; Flores-Anderson, A.I.; Muench, R.E.; Markert, K.N.; Adams, E.C.; Limaye, A.S.; Irwin, D.E. Use of Public Earth Observation Data for Tracking Progress in Sustainable Management of Coastal Forest Ecosystems in Belize, Central America. *Remote Sensing of Environment* **2020**, *245*, 111798, doi:10.1016/j.rse.2020.111798.
51. Chouari, W. Wetland Land Cover Change Detection Using Multitemporal Landsat Data: A Case Study of the Al-Asfar Wetland, Kingdom of Saudi Arabia. *Arab J Geosci* **2021**, *14*, 523, doi:10.1007/s12517-021-06815-y.
52. Cissell, J.R.; Steinberg, M.K. Mapping Forty Years of Mangrove Cover Trends and Their Implications for Flats Fisheries in Ciénaga de Zapata, Cuba. *Environmental Biology of Fishes* **2018**, *102*, 417–427.
53. Collados-Lara, A.-J.; Pardo-Igúzquiza, E.; Pulido-Velazquez, D.; Baena-Ruiz, L. Estimation of the Monthly Dynamics of Surface Water in Wetlands from Satellite and Secondary Hydro-Climatological Data. *Remote Sensing* **2021**, *13*, 2380, doi:10.3390/rs13122380.
54. Cong, P.; Chen, K.; Qu, L.; Han, J. Dynamic Changes in the Wetland Landscape Pattern of the Yellow River Delta from 1976 to 2016 Based on Satellite Data. *Chin. Geogr. Sci.* **2019**, *29*, 372–381, doi:10.1007/s11769-019-1039-x.
55. Constance, A.; Haverkamp, P.J.; Bunbury, N.; Schaepman-Strub, G. Extent Change of Protected Mangrove Forest and Its Relation to Wave Power Exposure on Aldabra Atoll. *Global Ecology and Conservation* **2021**, *27*, e01564, doi:10.1016/j.gecco.2021.e01564.
56. Conti, L.A.; Sampaio de Araujo, C.A.; Cunha-Lignon, M. [UNESP Spatial Database Modeling for Mangrove Forests Mapping; Example of Two Estuarine Systems in Brazil. *Modeling Earth Systems And Environment* **2016**, *12*, doi:10.1007/s40808-016-0129-3.
57. Dang, A.T.; Kumar, L.; Reid, M.; Nguyen, H. Remote Sensing Approach for Monitoring Coastal Wetland in the Mekong Delta, Vietnam: Change Trends and Their Driving Forces. *Remote Sensing* **2021**, *13*, 3359.
58. Dangles, O.; Rabatel, A.; Kraemer, M.; Zeballos, G.; Soruco, A.; Jacobsen, D.; Anthelme, F. Ecosystem Sentinels for Climate Change? Evidence of Wetland Cover Changes over the Last 30 Years in the Tropical Andes. *PLoS ONE* **2017**, *12*, e0175814, doi:10.1371/journal.pone.0175814.
59. Darmawan, S.; Sari, D.K.; Wikantika, K.; Tridawati, A.; Hernawati, R.; Sedu, M.K. Identification Before-after Forest Fire and Prediction of Mangrove Forest Based on Markov-Cellular Automata in Part of Sembilang National Park, Banyuasin, South Sumatra, Indonesia. *Remote Sensing* **2020**, *12*, 3700, doi:10.3390/rs12223700.

60. Das, R.T.; Pal, S. Exploring Geospatial Changes of Wetland in Different Hydrological Paradigms Using Water Presence Frequency Approach in Barind Tract of West Bengal. *Spat. Inf. Res.* **2017**, *25*, 467–479, doi:10.1007/s41324-017-0114-6.
61. Datta, D.; Deb, S. Analysis of Coastal Land Use/Land Cover Changes in the Indian Sunderbans Using Remotely Sensed Data. *Geo-spatial Information Science* **2012**, *15*, 241–250, doi:10.1080/10095020.2012.714104.
62. Dawson, S.K.; Fisher, A.; Lucas, R.; Hutchinson, D.K.; Berney, P.; Keith, D.; Catford, J.A.; Kingsford, R.T. Remote Sensing Measures Restoration Successes, but Canopy Heights Lag in Restoring Floodplain Vegetation. *Remote Sensing* **2016**, *8*, 542, doi:10.3390/rs8070542.
63. de la Fuente, A.; Meruane, C.; Suárez, F. Long-Term Spatiotemporal Variability in High Andean Wetlands in Northern Chile. *Science of The Total Environment* **2021**, *756*, 143830, doi:10.1016/j.scitotenv.2020.143830.
64. Dearborn, K.D.; Baltzer, J.L. Unexpected Greening in a Boreal Permafrost Peatland Undergoing Forest Loss Is Partially Attributable to Tree Species Turnover. *Glob Change Biol* **2021**, *27*, 2867–2882, doi:10.1111/gcb.15608.
65. Dervisoglu, A. Analysis of the Temporal Changes of Inland Ramsar Sites in Turkey Using Google Earth Engine. *IJGI* **2021**, *10*, 521, doi:10.3390/ijgi10080521.
66. Dervisoglu, A.; Musaoğlu, N.; Tanik, A.; Şeker, D.; Kaya, Ş. Satellite-Based Temporal Assessment of a Dried Lake: Case Study of Akgol Wetland. *FRESENIUS ENVIRONMENTAL BULLETIN* **2017**, *26*.
67. Dewidar, K.M. Monitoring Temporal Changes of the Surface Water Area of the Burullus and Manzala Lagoons Using Automatic Techniques Applied to a Landsat Satellite Data Series of the Nile Delta Coast. *Mediterranean Marine Science* **2011**, *12*, 462–478, doi:10.12681/mms.45.
68. Díaz-Delgado, R.; Aragonés, D.; Afán, I.; Bustamante, J. Long-Term Monitoring of the Flooding Regime and Hydroperiod of Doñana Marshes with Landsat Time Series (1974–2014). *Remote Sensing* **2016**, *8*, 775, doi:10.3390/rs8090775.
69. Ding, X.; Shan, X.; Chen, Y.; Li, M.; Li, J.; Jin, X. Variations in Fish Habitat Fragmentation Caused by Marine Reclamation Activities in the Bohai Coastal Region, China. *Ocean & Coastal Management* **2020**, *184*, 105038.
70. Dingle Robertson, L.; King, D.J.; Davies, C. Assessing Land Cover Change and Anthropogenic Disturbance in Wetlands Using Vegetation Fractions Derived from Landsat 5 TM Imagery (1984–2010). *Wetlands* **2015**, *35*, 1077–1091, doi:10.1007/s13157-015-0696-5.
71. Diniz, C.; Cortinhas, L.; Nerino, G.; Rodrigues, J.; Sadeck, L.; Adami, M.; Souza-Filho, P. Brazilian Mangrove Status: Three Decades of Satellite Data Analysis. *Remote Sensing* **2019**, *11*, 808, doi:10.3390/rs11070808.
72. Dipson, P.T.; Chithra, S.V.; Amarnath, A.; Smitha, S.V.; Harindranathan Nair, M.V.; Shahin, A. Spatial Changes of Estuary in Ernakulam District, Southern India for Last Seven Decades, Using Multi-Temporal Satellite Data. *Journal of Environmental Management* **2015**, *148*, 134–142, doi:10.1016/j.jenvman.2014.02.021.
73. Disperati, L.; Viridis, S.G.P. Assessment of Land-Use and Land-Cover Changes from 1965 to 2014 in Tam Giang-Cau Hai Lagoon, Central Vietnam. *Applied Geography* **2015**, *58*, 48–64, doi:10.1016/j.apgeog.2014.12.012.
74. Dong, X.; Chen, Z. Digital Examination of Vegetation Changes in River Floodplain Wetlands Based on Remote Sensing Images: A Case Study Based on the Downstream Section of Hailar River. *Forests* **2021**, *12*, 1206.
75. Dou, P.; Cui, B. Dynamics and Integrity of Wetland Network in Estuary. *Ecological Informatics* **2014**, *24*, 1–10, doi:10.1016/j.ecoinf.2014.06.002.
76. Douglas, S.H.; Bernier, J.C.; Smith, K.E.L. Analysis of Multi-Decadal Wetland Changes, and Cumulative Impact of Multiple Storms 1984 to 2017. *Wetlands Ecol Manage* **2018**, *26*, 1121–1142, doi:10.1007/s11273-018-9635-6.

77. Doyle, C.; Beach, T.; Luzzadder-Beach, S. Tropical Forest and Wetland Losses and the Role of Protected Areas in Northwestern Belize, Revealed from Landsat and Machine Learning. *Remote Sensing* **2021**, *13*, 379, doi:10.3390/rs13030379.
78. Duku, E.; Mattah, P.A.D.; Angnuureng, D.B. Assessment of Land Use/Land Cover Change and Morphometric Parameters in the Keta Lagoon Complex Ramsar Site, Ghana. *Water* **2021**, *13*, 2537.
79. Duncan, C.; Böhm, M.; Turvey, S.T. Identifying the Possibilities and Pitfalls of Conducting IUCN Red List Assessments from Remotely Sensed Habitat Information Based on Insights from Poorly Known Cuban Mammals. *Conservation Biology* **2021**, *35*, 1598–1614, doi:10.1111/cobi.13715.
80. Eddy, S.; Iskandar, I.; Ridho, M.R.; Mulyana, A. Land Cover Changes in the Air Telang Protected Forest, South Sumatra, Indonesia (1989–2013). *Biodiversitas Journal of Biological Diversity* **2017**, *18*, 1538–1545, doi:10.13057/biodiv/d180431.
81. Eddy, S.; Milantara, N.; Sasmito, S.D.; Kajita, T.; Basyuni, M. Anthropogenic Drivers of Mangrove Loss and Associated Carbon Emissions in South Sumatra, Indonesia. *Forests* **2021**, *12*, 187, doi:10.3390/f12020187.
82. Ehsani, A.H.; Shakeryari, M. Monitoring of Wetland Changes Affected by Drought Using Four Landsat Satellite Data and Fuzzy ARTMAP Classification Method (Case Study Hamoun Wetland, Iran). *Arab J Geosci* **2021**, *14*, 1363, doi:10.1007/s12517-020-06320-8.
83. Ekumah, B.; Armah, F.A.; Afrifa, E.K.A.; Aheto, D.W.; Odoi, J.O.; Afitiri, A.-R. Geospatial Assessment of Ecosystem Health of Coastal Urban Wetlands in Ghana. *Ocean & Coastal Management* **2020**, *193*, 105226, doi:10.1016/j.ocecoaman.2020.105226.
84. Eslami-Andargoli, L.; Dale, P.E.R.; Sipe, N.; Chaseling, J. Local and Landscape Effects on Spatial Patterns of Mangrove Forest during Wetter and Drier Periods: Moreton Bay, Southeast Queensland, Australia. *Estuarine, Coastal and Shelf Science* **2010**, *89*, 53–61, doi:10.1016/j.ecss.2010.05.011.
85. Fazelpoor, K.; Yousefi, S.; Martínez-Fernández, V.; García de Jalón, D. Geomorphological Evolution along International Riverine Borders: The Flow of the Aras River through Iran, Azerbaijan, and Armenia. *Journal of Environmental Management* **2021**, *290*, 112599, doi:10.1016/j.jenvman.2021.112599.
86. Feng, L.; Han, X.; Hu, C.; Chen, X. Four Decades of Wetland Changes of the Largest Freshwater Lake in China: Possible Linkage to the Three Gorges Dam? *Remote Sensing of Environment* **2016**, *176*, 43–55, doi:10.1016/j.rse.2016.01.011.
87. Feng, Z.; Tan, G.; Xia, J.; Shu, C.; Chen, P.; Wu, M.; Wu, X. Dynamics of Mangrove Forests in Shenzhen Bay in Response to Natural and Anthropogenic Factors from 1988 to 2017. *Journal of Hydrology* **2020**, *591*, 125271, doi:10.1016/j.jhydrol.2020.125271.
88. Fickas, K.C.; Cohen, W.B.; Yang, Z. Landsat-Based Monitoring of Annual Wetland Change in the Willamette Valley of Oregon, USA from 1972 to 2012. *Wetlands Ecol Manage* **2016**, *24*, 73–92, doi:10.1007/s11273-015-9452-0.
89. Fitoka, E.; Tompoulidou, M.; Hatziiordanou, L.; Apostolakis, A.; Höfer, R.; Weise, K.; Ververis, C. Water-Related Ecosystems' Mapping and Assessment Based on Remote Sensing Techniques and Geospatial Analysis: The SWOS National Service Case of the Greek Ramsar Sites and Their Catchments. *Remote Sensing of Environment* **2020**, *245*, 111795, doi:10.1016/j.rse.2020.111795.
90. Fragal, E.H.; Silva, T.S.F.; Novo, E.M.L. de M. Reconstructing Historical Forest Cover Change in the Lower Amazon Floodplains Using the LandTrendr Algorithm. *Acta Amaz.* **2016**, *46*, 13–24, doi:10.1590/1809-4392201500835.
91. Gao, W.; Wan, L.H.; Du, Y.X.; Zhu, D.Y. The Effect of Landscape Pattern in Response to Ecological Environment and Climate Change in Xiaoxing'Anling, Heilongjiang Province, China. *APPLIED ECOLOGY AND ENVIRONMENTAL RESEARCH* **2019**, *17*, 15419–15429.

92. Gao, Z.; Guo, H.; Li, S.; Wang, J.; Ye, H.; Han, S.; Cao, W. Remote Sensing of Wetland Evolution in Predicting Shallow Groundwater Arsenic Distribution in Two Typical Inland Basins. *Science of The Total Environment* **2022**, *806*, 150496.
93. Gayol, M.P.; Morandeira, N.S.; Kandus, P. Dynamics of Shallow Lake Cover Types in Relation to Paraná River Flood Pulses: Assessment with Multitemporal Landsat Data. *Hydrobiologia* **2019**, *833*, 9–24.
94. Geng, M.; Li, F.; Gao, Y.; Li, Z.; Chen, X.; Deng, Z.; Zou, Y.; Xie, Y.; Wang, Z. Wetland Area Change from 1986–2016 in the Dongting Lake Watershed at the Sub-Watershed Scale. *Polish Journal of Environmental Studies* **2021**, *30*.
95. Gholami, D.M.; Baharlouii, M. Monitoring Long-Term Mangrove Shoreline Changes along the Northern Coasts of the Persian Gulf and the Oman Sea. *Emerging Science Journal* **2019**, *3*, 88–100.
96. Ghosh, M.; Kumar, L.; Roy, C. Climate Variability and Mangrove Cover Dynamics at Species Level in the Sundarbans, Bangladesh. *Sustainability* **2017**, *9*, 805, doi:10.3390/su9050805.
97. Ghosh, M.K.; Kumar, L.; Roy, C. Mapping Long-Term Changes in Mangrove Species Composition and Distribution in the Sundarbans. *Forests* **2016**, *7*, 305, doi:10.3390/f7120305.
98. Gilani, H.; Naz, H.I.; Arshad, M.; Nazim, K.; Akram, U.; Abrar, A.; Asif, M. Evaluating Mangrove Conservation and Sustainability through Spatiotemporal (1990–2020) Mangrove Cover Change Analysis in Pakistan. *Estuarine, Coastal and Shelf Science* **2021**, *249*, 107128, doi:10.1016/j.ecss.2020.107128.
99. Giri, C.; Long, J. Is the Geographic Range of Mangrove Forests in the Conterminous United States Really Expanding? *Sensors* **2016**, *16*, 2010, doi:10.3390/s16122010.
100. Godoy, M.D.P.; de Lacerda, L.D. River-Island Morphological Response to Basin Land-Use Change within the Jaguaribe River Estuary, NE Brazil. *Journal of Coastal Research* **2014**, *30*, 399–410, doi:10.2112/JCOASTRES-D-13-00059.1.
101. Gong, Z.; Li, H.; Zhao, W.; Gong, H. Driving Forces Analysis of Reservoir Wetland Evolution in Beijing during 1984–2010. *J. Geogr. Sci.* **2013**, *23*, 753–768, doi:10.1007/s11442-013-1042-6.
102. Gopalakrishnan, L.; Satyanarayana, B.; Chen, D.; Wolswijk, G.; Amir, A.A.; Vandegheuchte, M.B.; Muslim, A.B.; Koedam, N.; Dahdouh-Guebas, F. Using Historical Archives and Landsat Imagery to Explore Changes in the Mangrove Cover of Peninsular Malaysia between 1853 and 2018. *Remote Sensing* **2021**, *13*, 3403.
103. Guo, H.; Cai, Y.; Yang, Z.; Zhu, Z.; Ouyang, Y. Dynamic Simulation of Coastal Wetlands for Guangdong-Hong Kong-Macao Greater Bay Area Based on Multi-Temporal Landsat Images and FLUS Model. *Ecological Indicators* **2021**, *125*, 107559, doi:10.1016/j.ecolind.2021.107559.
104. Halabisky, M.; Moskal, L.M.; Gillespie, A.; Hannam, M. Reconstructing Semi-Arid Wetland Surface Water Dynamics through Spectral Mixture Analysis of a Time Series of Landsat Satellite Images (1984–2011). *Remote Sensing of Environment* **2016**, *177*, 171–183, doi:10.1016/j.rse.2016.02.040.
105. Halder, S.; Samanta, K.; Das, S.; Pathak, D. Monitoring the Inter-Decade Spatial–Temporal Dynamics of the Sundarban Mangrove Forest of India from 1990 to 2019. *Regional Studies in Marine Science* **2021**, *44*, 101718, doi:10.1016/j.rsma.2021.101718.
106. Hamandawana, H.; Atyosi, Y.; Bornman, T.G. Multi-Temporal Reconstruction of Long-Term Changes in Land Cover in and around the Swartkops River Estuary, Eastern Cape, South Africa. *Environ Monit Assess* **2020**, *192*, 173, doi:10.1007/s10661-020-8136-2.
107. Han, X.; Chen, X.; Feng, L. Four Decades of Winter Wetland Changes in Poyang Lake Based on Landsat Observations between 1973 and 2013. *Remote Sensing of Environment* **2015**, *156*, 426–437, doi:10.1016/j.rse.2014.10.003.

108. Han, X.; Feng, L.; Hu, C.; Kramer, P. Hurricane-Induced Changes in the Everglades National Park Mangrove Forest: Landsat Observations between 1985 and 2017. *Journal of Geophysical Research: Biogeosciences* **2018**, *123*, 3470–3488.
109. Haque, Md.I.; Basak, R. Land Cover Change Detection Using GIS and Remote Sensing Techniques: A Spatio-Temporal Study on Tanguar Haor, Sunamganj, Bangladesh. *The Egyptian Journal of Remote Sensing and Space Science* **2017**, *20*, 251–263, doi:10.1016/j.ejrs.2016.12.003.
110. Harezlak, V.; Geerling, G.W.; Rogers, C.K.; Penning, W.E.; Augustijn, D.C.M.; Hulscher, S.J.M.H. Revealing 35 Years of Landcover Dynamics in Floodplains of Trained Lowland Rivers Using Satellite Data. *River Res Applic* **2020**, *36*, 1213–1221, doi:10.1002/rra.3633.
111. Hartman, B.D.; Bookhagen, B.; Chadwick, O.A. The Effects of Check Dams and Other Erosion Control Structures on the Restoration of Andean Bofedal Ecosystems. *Restoration Ecology* **2016**, *24*, 761–772, doi:10.1111/rec.12402.
112. Hashim, B.M.; Sultan, M.A.; Attyia, M.N.; Al Maliki, A.A.; Al-Ansari, N. Change Detection and Impact of Climate Changes to Iraqi Southern Marshes Using Landsat 2 MSS, Landsat 8 OLI and Sentinel 2 MSI Data and GIS Applications. *Applied Sciences* **2019**, *9*, 2016, doi:10.3390/app9102016.
113. Hason, M.M.; Abbood, I.S.; Odaa, S. aldeen Land Cover Reflectance of Iraqi Marshlands Based on Visible Spectral Multiband of Satellite Imagery. *Results in Engineering* **2020**, *8*, 100167, doi:10.1016/j.rineng.2020.100167.
114. Hempattarasuwan, N.; Christakos, G.; Wu, J. Changes of Wiang Nong Lom and Nong Luang Wetlands in Chiang Saen Valley (Chiang Rai Province, Thailand) During the Period 1988–2017. *IEEE J. Sel. Top. Appl. Earth Observations Remote Sensing* **2019**, *12*, 4224–4238, doi:10.1109/JSTARS.2019.2937949.
115. Hiernaux, P.; Turner, M.D.; Eggen, M.; Marie, J.; Haywood, M. Resilience of Wetland Vegetation to Recurrent Drought in the Inland Niger Delta of Mali from 1982 to 2014. *Wetlands Ecol Manage* **2021**, *29*, 945–967, doi:10.1007/s11273-021-09822-8.
116. Ho, J.C.; Stumpf, R.P.; Bridgeman, T.B.; Michalak, A.M. Using Landsat to Extend the Historical Record of Lacustrine Phytoplankton Blooms: A Lake Erie Case Study. *Remote Sensing of Environment* **2017**, *191*, 273–285, doi:10.1016/j.rse.2016.12.013.
117. Hong, H.T.C.; Avtar, R.; Fujii, M. Monitoring Changes in Land Use and Distribution of Mangroves in the Southeastern Part of the Mekong River Delta, Vietnam. *Trop Ecol* **2019**, *60*, 552–565, doi:10.1007/s42965-020-00053-1.
118. Hopkinson, C.; Fuoco, B.; Grant, T.; Bayley, S.E.; Brisco, B.; MacDonald, R. Wetland Hydroperiod Change Along the Upper Columbia River Floodplain, Canada, 1984 to 2019. *Remote Sensing* **2020**, *12*, 4084, doi:10.3390/rs12244084.
119. Htwe, T.N.; Kywe, M.; Buerkert, A.; Brinkmann, K. Transformation Processes in Farming Systems and Surrounding Areas of Inle Lake, Myanmar, during the Last 40 Years. *Journal of Land Use Science* **2015**, *10*, 205–223, doi:10.1080/1747423X.2013.878764.
120. Hu, L.; Li, W.; Xu, B. Monitoring Mangrove Forest Change in China from 1990 to 2015 Using Landsat-Derived Spectral-Temporal Variability Metrics. *International Journal of Applied Earth Observation and Geoinformation* **2018**, *73*, 88–98, doi:10.1016/j.jag.2018.04.001.
121. Huo, H.; Guo, J.; Li, Z.-L.; Jiang, X. Remote Sensing of Spatiotemporal Changes in Wetland Geomorphology Based on Type 2 Fuzzy Sets: A Case Study of Beidagang Wetland from 1975 to 2015. *Remote Sensing* **2017**, *9*, 683, doi:10.3390/rs9070683.

122. Hussien, K.; Demissie, B.; Meaza, H. Spatiotemporal Wetland Changes and Their Threats in North Central Ethiopian Highlands: Kassaye Hussien, Biadgilgn Demissie and Hailemariam Meaza. *Singapore Journal of Tropical Geography* **2018**, *39*, 332–350, doi:10.1111/sjtg.12242.
123. Ibitoye, M.O.; Komolafe, A.A.; Adegboyega, A.-A.S.; Adebola, A.O.; Oladeji, O.D. Analysis of Vulnerable Urban Properties within River Ala Floodplain in Akure, Southwestern Nigeria. *Spat. Inf. Res.* **2019**, *28*, 431–445, doi:10.1007/s41324-019-00298-6.
124. Ibrahim, T.; Geremew, B.; Tesfay, F. Spatio-Temporal Dynamic of Land Use and Land Cover in Andit Tid Watershed, Wet Frost/Afro-Alpine Highland of Ethiopia. *Edelweiss Applied Science and Technology* **2021**, *5*, 33–38.
125. İrdemez, Ş.; Eymirli, E.B. Determination of Spatiotemporal Changes in Erzurum Plain Wetland System Using Remote Sensing Techniques. *Environmental Monitoring and Assessment* **2021**, *193*, 1–13.
126. Islam, H.; Abbasi, H.; Karam, A.; Chughtai, A.H.; Ahmed Jiskani, M. Geospatial Analysis of Wetlands Based on Land Use/Land Cover Dynamics Using Remote Sensing and GIS in Sindh, Pakistan. *Science Progress* **2021**, *104*, 00368504211026143.
127. Islam, Md.M.; Borgqvist, H.; Kumar, L. Monitoring Mangrove Forest Landcover Changes in the Coastline of Bangladesh from 1976 to 2015. *Geocarto International* **2019**, *34*, 1458–1476, doi:10.1080/10106049.2018.1489423.
128. Jacintha, T.; Rajasree, S.R.; Kumar, J.D.; Sriganesh, J. Assessment of Wetland Change Dynamics of Chennai Coast, Tamil Nadu, India, Using Satellite Remote Sensing. **2019**.
129. Jacob, A.L.; Bonnell, T.R.; Dowhaniuk, N.; Hartter, J. Topographic and Spectral Data Resolve Land Cover Misclassification to Distinguish and Monitor Wetlands in Western Uganda. *ISPRS Journal of Photogrammetry and Remote Sensing* **2014**, *94*, 114–126, doi:10.1016/j.isprsjprs.2014.05.001.
130. Jamali, A.A.; Naeeni, M.A.M.; Zarei, G. Assessing the Expansion of Saline Lands through Vegetation and Wetland Loss Using Remote Sensing and GIS. *Remote Sensing Applications: Society and Environment* **2020**, *20*, 100428.
131. Jayanthi, M.; Thirumurthy, S.; Muralidhar, M.; Ravichandran, P. Impact of Shrimp Aquaculture Development on Important Ecosystems in India. *Global Environmental Change* **2018**, *52*, 10–21, doi:10.1016/j.gloenvcha.2018.05.005.
132. Jayanthi, M.; Thirumurthy, S.; Nagaraj, G.; Muralidhar, M.; Ravichandran, P. Spatial and Temporal Changes in Mangrove Cover across the Protected and Unprotected Forests of India. *Estuarine, Coastal and Shelf Science* **2018**, *213*, 81–91, doi:10.1016/j.ecss.2018.08.016.
133. Jia, M.; Liu, M.; Wang, Z.; Mao, D.; Ren, C.; Cui, H. Evaluating the Effectiveness of Conservation on Mangroves: A Remote Sensing-Based Comparison for Two Adjacent Protected Areas in Shenzhen and Hong Kong, China. *Remote Sensing* **2016**, *8*, 627, doi:10.3390/rs8080627.
134. Jia, M.; Wang, Z.; Liu, D.; Ren, C.; Tang, X.; Dong, Z. Monitoring Loss and Recovery of Salt Marshes in the Liao River Delta, China. *Journal of Coastal Research* **2015**, *31*, 371–377, doi:10.2112/JCOASTRES-D-13-00056.1.
135. Jia, M.; Wang, Z.; Zhang, Y.; Ren, C.; Song, K. Landsat-Based Estimation of Mangrove Forest Loss and Restoration in Guangxi Province, China, Influenced by Human and Natural Factors. *IEEE Journal of Selected Topics in Applied Earth Observations and Remote Sensing* **2015**, *8*, 311–323, doi:10.1109/JSTARS.2014.2333527.
136. Jia, M.; Wang, Z.; Zhang, Y.; Mao, D.; Wang, C. Monitoring Loss and Recovery of Mangrove Forests during 42 Years: The Achievements of Mangrove Conservation in China. *International Journal of Applied Earth Observation and Geoinformation* **2018**, *73*, 535–545, doi:10.1016/j.jag.2018.07.025.

137. Jia, P.; Zhang, Y.; Xu, W.; Xia, Z.; Zhong, C.; Yin, Y. Spatio-Temporal Evolution of Coastlines of Sand-Barrier Lagoons over 26 Years through Historic Landsat Imagery in Lingshui County, Hainan Province, China. *J Coast Conserv* **2018**, *23*, 817–827, doi:10.1007/s11852-018-0664-3.
138. Jiang, W.; Wang, W.; Chen, Y.; Liu, J.; Tang, H.; Hou, P.; Yang, Y. Quantifying Driving Forces of Urban Wetlands Change in Beijing City. *J. Geogr. Sci.* **2012**, *22*, 301–314, doi:10.1007/s11442-012-0928-z.
139. Jin, H.; Huang, C.; Lang, M.W.; Yeo, I.-Y.; Stehman, S.V. Monitoring of Wetland Inundation Dynamics in the Delmarva Peninsula Using Landsat Time-Series Imagery from 1985 to 2011. *Remote Sensing of Environment* **2017**, *190*, 26–41, doi:10.1016/j.rse.2016.12.001.
140. John, S.; C, R.; Muraleedharan, K.R.; B, S.; G, S.; Azeez S, A. Current Asymmetry and Its Implications for Morphological Changes in Vembanad Lake, the Second Largest Wetland Ecosystem in India. *Estuarine, Coastal and Shelf Science* **2020**, *246*, 107013, doi:10.1016/j.ecss.2020.107013.
141. Jordan, Y.C.; Ghulam, A.; Herrmann, R.B. Floodplain Ecosystem Response to Climate Variability and Land-Cover and Land-Use Change in Lower Missouri River Basin. *Landscape Ecol* **2012**, *27*, 843–857, doi:10.1007/s10980-012-9748-x.
142. Jouma, N.; Dadaser-Celik, F. Landscape Transformation after Irrigation Development in and around a Semi-Arid Wetland Ecosystem. *Landscape and Ecological Engineering* **2021**, *17*, 439–457.
143. Ju, J.; Masek, J.G. The Vegetation Greenness Trend in Canada and US Alaska from 1984–2012 Landsat Data. *Remote Sensing of Environment* **2016**, *176*, 1–16, doi:10.1016/j.rse.2016.01.001.
144. Kabiri, S.; Allen, M.; Okuonzia, J.T.; Akello, B.; Ssabaganzi, R.; Mubiru, D. Detecting Level of Wetland Encroachment for Urban Agriculture in Uganda Using Hyper-Temporal Remote Sensing 2020, 3.
145. Kanniah, K.D.; Sheikhi, A.; Cracknell, A.P.; Goh, H.C.; Tan, K.P.; Ho, C.S.; Rasli, F.N. Satellite Images for Monitoring Mangrove Cover Changes in a Fast Growing Economic Region in Southern Peninsular Malaysia. *Remote Sensing* **2015**, *7*, 14360–14385, doi:10.3390/rs71114360.
146. Karim, M.; Maanan, M.; Maanan, M.; Rhinane, H.; Rueff, H.; Baidder, L. Assessment of Water Body Change and Sedimentation Rate in Moulay Bousselham Wetland, Morocco, Using Geospatial Technologies. *International journal of sediment research* **2019**, *34*, 65–72.
147. Kawser, U.; Hoque, A.; Nath, B. Observing the Impacts of 1950s Great Assam Earthquake in the Tectono-Geomorphological Deformations at the Young Meghna Estuarine Floodplain of Bangladesh: Evidence from Noakhali Coastal Region. *Arab J Geosci* **2021**, *14*, 306, doi:10.1007/s12517-020-06427-y.
148. Kayastha, N.; Thomas, V.; Galbraith, J.; Banskota, A. Monitoring Wetland Change Using Inter-Annual Landsat Time-Series Data. *Wetlands* **2012**, *32*, 1149–1162, doi:10.1007/s13157-012-0345-1.
149. Kearney, M.S.; Riter, J.C.A.; Turner, R.E. Freshwater River Diversions for Marsh Restoration in Louisiana: Twenty-Six Years of Changing Vegetative Cover and Marsh Area. *Geophysical Research Letters* **2011**, *38*, doi:10.1029/2011GL047847.
150. Kharazmi, R.; Tavili, A.; Rahdari, M.R.; Chaban, L.; Panidi, E.; Rodrigo-Comino, J. Monitoring and Assessment of Seasonal Land Cover Changes Using Remote Sensing: A 30-Year (1987–2016) Case Study of Hamoun Wetland, Iran. *Environ Monit Assess* **2018**, *190*, 356, doi:10.1007/s10661-018-6726-z.
151. Kirui, K.B.; Kairo, J.G.; Bosire, J.; Viergever, K.M.; Rudra, S.; Huxham, M.; Briers, R.A. Mapping of Mangrove Forest Land Cover Change along the Kenya Coastline Using Landsat Imagery. *Ocean & Coastal Management* **2013**, *83*, 19–24, doi:10.1016/j.ocecoaman.2011.12.004.
152. Kolari, T.H.; Sallinen, A.; Wolff, F.; Kumpula, T.; Tolonen, K.; Tahvanainen, T. Ongoing Fen–Bog Transition in a Boreal Aapa Mire Inferred from Repeated Field Sampling, Aerial Images, and Landsat Data. *Ecosystems* **2021**, 1–23.

153. Koshale, J.P.; Mahato, A. Spatio-Temporal Change Detection and Its Impact on the Waterbodies by Monitoring LU/LC Dynamics-A Case Study from Holy City of Ratanpur, Chhattisgarh, India. *Nature Environment & Pollution Technology* **2020**, *19*.
154. Krapu, C.; Kumar, M.; Borsuk, M. Identifying Wetland Consolidation Using Remote Sensing in the North Dakota Prairie Pothole Region. *Water Resour. Res.* **2018**, *54*, 7478–7494, doi:10.1029/2018WR023338.
155. Kubo, S.; Naga Kumar, K.Ch.V.; Demudu, G.; Hema Malini, B.; Nageswara Rao, K.; Agrawal, R.; Ramakrishnan, R.; Rajawat, A.S. Monitoring of Eco-Restoration of Mangrove Wetlands through Time Series Satellite Images: A Study on Krishna-Godavari Delta Region, East Coast of India. *Geog. Rev. Japan B* **2017**, *90*, 66–75, doi:10.4157/geogrevjapanb.90.66.
156. Kuleli, T.; Guneroglu, A.; Karsli, F.; Dihkan, M. Automatic Detection of Shoreline Change on Coastal Ramsar Wetlands of Turkey. *Ocean Engineering* **2011**, *38*, 1141–1149, doi:10.1016/j.oceaneng.2011.05.006.
157. Kumar, M.; Mondal, I.; Pham, Q.B. Monitoring Forest Landcover Changes in the Eastern Sundarban of Bangladesh from 1989 to 2019. *Acta Geophys.* **2021**, *69*, 561–577, doi:10.1007/s11600-021-00551-3.
158. Laengner, M.L.; Siteur, K.; van der Wal, D. Trends in the Seaward Extent of Saltmarshes across Europe from Long-Term Satellite Data. *Remote Sensing* **2019**, *11*, 1653, doi:10.3390/rs11141653.
159. Lamsal, P.; Atreya, K.; Ghosh, M.K.; Pant, K.P. Effects of Population, Land Cover Change, and Climatic Variability on Wetland Resource Degradation in a Ramsar Listed Ghodaghodi Lake Complex, Nepal. *Environ Monit Assess* **2019**, *191*, 415, doi:10.1007/s10661-019-7514-0.
160. Lap, Q.K.; Luong, V.N.; Hong, X.T.; Tu, T.T.; Thanh, K.T.P. Evaluation of Mangrove Rehabilitation After Being Destroyed by Chemical Warfare Using Remote Sensing Technology: A Case Study in Can Gio Mangrove Forest in Mekong Delta, Southern Vietnam. *APPLIED ECOLOGY AND ENVIRONMENTAL RESEARCH* **2021**, *19*, 3897–3930.
161. Li, D.; Lu, D.; Wu, M.; Shao, X.; Wei, J. Examining Land Cover and Greenness Dynamics in Hangzhou Bay in 1985–2016 Using Landsat Time-Series Data. *Remote Sensing* **2017**, *10*, 32, doi:10.3390/rs10010032.
162. Li, J.; Hu, J.; Wei, D.; Sheng-li, H.; Hai-feng, J.; Chun-ling, Z.; Huai-xiu, L. Revealing storage-area relationship of open water in ungauged subalpine wetland - Napahai in Northwest Yunnan, China. *IMHE OpenIR* **2013**, *10*, doi:10.1007/s11629-013-2596-6.
163. Li, M.S.; Mao, L.J.; Shen, W.J.; Liu, S.Q.; Wei, A.S. Change and Fragmentation Trends of Zhanjiang Mangrove Forests in Southern China Using Multi-Temporal Landsat Imagery (1977–2010). *Estuarine, Coastal and Shelf Science* **2013**, *130*, 111–120, doi:10.1016/j.ecss.2013.03.023.
164. Li, X.; Mitra, C.; Marzen, L.; Yang, Q. Spatial and Temporal Patterns of Wetland Cover Changes in East Kolkata Wetlands, India from 1972 to 2011. *IJAGR* **2016**, *7*, 1–13, doi:10.4018/ijagr.2016040101.
165. Li, Y.; Mao, D.; Wang, Z.; Wang, X.; Tan, X.; Jia, M.; Ren, C. Identifying Variable Changes in Wetlands and Their Anthropogenic Threats Bordering the Yellow Sea for Water Bird Conservation. *Global Ecology and Conservation* **2021**, *27*, e01613, doi:10.1016/j.gecco.2021.e01613.
166. Li, Z.; Gong, Z.; Guan, H.; Zhang, Q. Dynamic Estimating of Wetland Vegetation Cover Based on Linear Spectral Mixture and Time Phase Transformation Models. *International Journal of Remote Sensing* **2018**, *39*, 9294–9311, doi:10.1080/01431161.2018.1531318.
167. Li, Z.; Liu, M.; Hu, Y.; Xue, Z.; Sui, J. The Spatiotemporal Changes of Marshland and the Driving Forces in the Sanjiang Plain, Northeast China from 1980 to 2016. *Ecol Process* **2020**, *9*, 24, doi:10.1186/s13717-020-00226-9.

168. Liang, K.; Li, Y. Changes in Lake Area in Response to Climatic Forcing in the Endorheic Hongjian Lake Basin, China. *Remote Sensing* **2019**, *11*, 3046, doi:10.3390/rs11243046.
169. Liao, H.; Li, G.; Cui, L.; Ouyang, N.; Zhang, Y.; Wang, S. Study on Evolution Features and Spatial Distribution Patterns of Coastal Wetlands in North Jiangsu Province, China. *Wetlands* **2014**, *34*, 877–891, doi:10.1007/s13157-014-0550-1.
170. Liao, J.; Zhen, J.; Zhang, L.; Metternicht, G. Understanding Dynamics of Mangrove Forest on Protected Areas of Hainan Island, China: 30 Years of Evidence from Remote Sensing. *Sustainability* **2019**, *11*, 5356, doi:10.3390/su11195356.
171. Lin, W.; Cen, J.; Xu, D.; Du, S.; Gao, J. Wetland Landscape Pattern Changes over a Period of Rapid Development (1985–2015) in the ZhouShan Islands of Zhejiang Province, China. *Estuarine, Coastal and Shelf Science* **2018**, *213*, 148–159.
172. Lin, Y.; Yu, J.; Cai, J.; Sneeuw, N.; Li, F. Spatio-Temporal Analysis of Wetland Changes Using a Kernel Extreme Learning Machine Approach. *Remote Sensing* **2018**, *10*, 1129, doi:10.3390/rs10071129.
173. Lipp-Nissinen, K.H.; de Sá Piñeiro, B.; Miranda, L.S.; de Paula Alves, A. Temporal Dynamics of Land Use and Cover in Paurá Lagoon Region, Middle Coast of Rio Grande Do Sul (RS), Brazil. *Journal of Integrated Coastal Zone Management* **2018**, *18*, 25–39.
174. Liu, D.; Chen, W.; Menz, G.; Dubovyk, O. Development of Integrated Wetland Change Detection Approach: In Case of Erdos Larus Relictus National Nature Reserve, China. *Science of The Total Environment* **2020**, *731*, 139166, doi:10.1016/j.scitotenv.2020.139166.
175. Liu, M.; Hu, D. Response of Wetland Evapotranspiration to Land Use/Cover Change and Climate Change in Liaoh River Delta, China. *Water* **2019**, *11*, 955, doi:10.3390/w11050955.
176. Liu, Y.; Liu, Y.; Li, J.; Sun, C.; Xu, W.; Zhao, B. Trajectory of Coastal Wetland Vegetation in Xiangshan Bay, China, from Image Time Series. *Marine Pollution Bulletin* **2020**, *160*, 111697, doi:10.1016/j.marpolbul.2020.111697.
177. Long, C.; Dai, Z.; Zhou, X.; Mei, X.; Mai Van, C. Mapping Mangrove Forests in the Red River Delta, Vietnam. *Forest Ecology and Management* **2021**, *483*, 118910, doi:10.1016/j.foreco.2020.118910.
178. Lopes, C.L.; Mendes, R.; Caçador, I.; Dias, J.M. Evaluation of Long-Term Estuarine Vegetation Changes through Landsat Imagery. *Science of The Total Environment* **2019**, *653*, 512–522, doi:10.1016/j.scitotenv.2018.10.381.
179. Lopes, C.L.; Mendes, R.; Caçador, I.; Dias, J.M. Assessing Salt Marsh Extent and Condition Changes with 35 Years of Landsat Imagery: Tagus Estuary Case Study. *Remote Sensing of Environment* **2020**, *247*, 111939, doi:10.1016/j.rse.2020.111939.
180. López, N.; Márquez Romance, A.; Guevara Pérez, E. Change Dynamics of Land-Use and Land-Cover for Tropical Wetland Management. *Water Practice and Technology* **2020**, *15*, 632–644, doi:10.2166/wpt.2020.049.
181. Louzada, R.O.; Bergier, I.; Assine, M.L. Landscape Changes in Avulsive River Systems: Case Study of Taquari River on Brazilian Pantanal Wetlands. *Science of The Total Environment* **2020**, *723*, 138067, doi:10.1016/j.scitotenv.2020.138067.
182. Lucas, R.; Van De Kerchove, R.; Otero, V.; Lagomasino, D.; Fatoyinbo, L.; Omar, H.; Satyanarayana, B.; Dahdouh-Guebas, F. Structural Characterisation of Mangrove Forests Achieved through Combining Multiple Sources of Remote Sensing Data. *Remote Sensing of Environment* **2020**, *237*, 111543, doi:10.1016/j.rse.2019.111543.
183. Luo, J.; Li, X.; Ma, R.; Li, F.; Duan, H.; Hu, W.; Qin, B.; Huang, W. Applying Remote Sensing Techniques to Monitoring Seasonal and Interannual Changes of Aquatic Vegetation in Taihu Lake, China. *Ecological Indicators* **2016**, *60*, 503–513, doi:10.1016/j.ecolind.2015.07.029.

184. Lv, J.; Jiang, W.; Wang, W.; Wu, Z.; Liu, Y.; Wang, X.; Li, Z. Wetland Loss Identification and Evaluation Based on Landscape and Remote Sensing Indices in Xiong'an New Area. *Remote Sensing* **2019**, *11*, 2834, doi:10.3390/rs11232834.
185. Lymburner, L.; Bunting, P.; Lucas, R.; Scarth, P.; Alam, I.; Phillips, C.; Ticehurst, C.; Held, A. Mapping the Multi-Decadal Mangrove Dynamics of the Australian Coastline. *Remote Sensing of Environment* **2020**, *238*, 111185, doi:10.1016/j.rse.2019.05.004.
186. Ma, C.; Ai, B.; Zhao, J.; Xu, X.; Huang, W. Change Detection of Mangrove Forests in Coastal Guangdong during the Past Three Decades Based on Remote Sensing Data. *Remote Sensing* **2019**, *11*, 921, doi:10.3390/rs11080921.
187. Mabwoga, S.O.; Thukral, A.K. Characterization of Change in the Harike Wetland, a Ramsar Site in India, Using Landsat Satellite Data. *SpringerPlus* **2014**, *3*, 576, doi:10.1186/2193-1801-3-576.
188. Mahdianpari, M.; Jafarzadeh, H.; Granger, J.E.; Mohammadimanesh, F.; Brisco, B.; Salehi, B.; Homayouni, S.; Weng, Q. A Large-Scale Change Monitoring of Wetlands Using Time Series Landsat Imagery on Google Earth Engine: A Case Study in Newfoundland. *GIScience & Remote Sensing* **2020**, *57*, 1102–1124, doi:10.1080/15481603.2020.1846948.
189. Maleki, S.; Koupaie, S.S.; Soffianian, A.; Saatchi, S.; Pourmanafi, S.; Rahdari, V. Human and Climate Effects on the Hamoun Wetlands. *Weather, Climate, and Society* **2019**, *11*, 609–622, doi:10.1175/WCAS-D-18-0070.1.
190. Mandal, M.S.H.; Hosaka, T. Assessing Cyclone Disturbances (1988–2016) in the Sundarbans Mangrove Forests Using Landsat and Google Earth Engine. *Nat Hazards* **2020**, *102*, 133–150, doi:10.1007/s11069-020-03914-z.
191. Mao, D.; Tian, Y.; Wang, Z.; Jia, M.; Du, J.; Song, C. Wetland Changes in the Amur River Basin: Differing Trends and Proximate Causes on the Chinese and Russian Sides. *Journal of Environmental Management* **2021**, *280*, 111670, doi:10.1016/j.jenvman.2020.111670.
192. Martínez-López, J.; Carreño, M.F.; Palazón-Ferrando, J.A.; Martínez-Fernández, J.; Esteve, M.A. Free Advanced Modeling and Remote-Sensing Techniques for Wetland Watershed Delineation and Monitoring. *International Journal of Geographical Information Science* **2014**, *28*, 1610–1625, doi:10.1080/13658816.2013.852677.
193. Marzvan, S.; Moravej, K.; Felegari, S.; Sharifi, A.; Askari, M.S. Risk Assessment of Alien *Azolla Filiculoides* Lam in Anzali Lagoon Using Remote Sensing Imagery. *Journal of the Indian Society of Remote Sensing* **2021**, *49*, 1801–1809.
194. Masria, A.; El-Adawy, A.A.; Sarhan, T. A Holistic Evaluation of Human-Induced LULCC and Shoreline Dynamics of El-Burullus Lagoon through Remote Sensing Techniques. *Innov. Infrastruct. Solut.* **2020**, *5*, 83, doi:10.1007/s41062-020-00331-w.
195. Mazzarino, M.; Finn, J.T. An NDVI Analysis of Vegetation Trends in an Andean Watershed. *Wetlands Ecol Manage* **2016**, *24*, 623–640, doi:10.1007/s11273-016-9492-0.
196. Medjani, F.; Hamdaoui, O.; Djidel, M.; Ducrot, D. Diachronic Evolution of Wetlands in a Desert Arid Climate of the Basin of Ouargla (Southeastern Algeria) between 1987 and 2009 by Remote Sensing. *Arab J Geosci* **2015**, *8*, 10181–10192, doi:10.1007/s12517-015-1958-5.
197. Meng, W.; Hu, B.; He, M.; Liu, B.; Mo, X.; Li, H.; Wang, Z.; Zhang, Y. Temporal-Spatial Variations and Driving Factors Analysis of Coastal Reclamation in China. *Estuarine, Coastal and Shelf Science* **2017**, *191*, 39–49, doi:10.1016/j.ecss.2017.04.008.
198. Mexicano, L.; Glenn, E.P.; Hinojosa-Huerta, O.; Garcia-Hernandez, J.; Flessa, K.; Hinojosa-Corona, A. Long-Term Sustainability of the Hydrology and Vegetation of Cienega de Santa Clara, an Anthropogenic Wetland Created by Disposal of Agricultural Drain Water in the Delta of the Colorado River, Mexico. *Ecological Engineering* **2013**, *59*, 111–120, doi:10.1016/j.ecoleng.2012.12.096.

199. Mialhe, F.; Gunnell, Y.; Navratil, O.; Choi, D.; Sovann, C.; Lejot, J.; Gaudou, B.; Se, B.; Landon, N. Spatial Growth of Phnom Penh, Cambodia (1973–2015): Patterns, Rates, and Socio-Ecological Consequences. *Land Use Policy* **2019**, *87*, 104061, doi:10.1016/j.landusepol.2019.104061.
200. Miranda, I.M.; Toldo Jr, E.E.; da Fontoura Klein, A.H.; da Silva, G.V. Shoreline Evolution of Lagoon Sandy Spits and Adjacent Beaches, Lagoa Dos Patos, Brazil. *Journal of Coastal Research* **2019**, *35*, 1010–1023.
201. Misra, A.; R., M.M.; P., V. Assessment of the Land Use/Land Cover (LU/LC) and Mangrove Changes along the Mandovi–Zuari Estuarine Complex of Goa, India. *Arab J Geosci* **2015**, *8*, 267–279, doi:10.1007/s12517-013-1220-y.
202. Mo, Y.; Kearney, M.S.; Turner, R.E. The Resilience of Coastal Marshes to Hurricanes: The Potential Impact of Excess Nutrients. *Environment International* **2020**, *138*, 105409, doi:10.1016/j.envint.2019.105409.
203. Mohanty, P.C.; Shetty, S.; Mahendra, R.S.; Nayak, R.K.; Sharma, L.K.; Rama Rao, E.P. Spatio-Temporal Changes of Mangrove Cover and Its Impact on Bio-Carbon Flux along the West Bengal Coast, Northeast Coast of India. *European Journal of Remote Sensing* **2021**, *54*, 525–537.
204. Mondal, D.; Pal, S. Monitoring Dual-Season Hydrological Dynamics of Seasonally Flooded Wetlands in the Lower Reach of Mayurakshi River, Eastern India. *Geocarto International* **2016**, *33*, 225–239, doi:10.1080/10106049.2016.1240720.
205. Mozumder, C.; Tripathi, N.K.; Tipdecho, T. Ecosystem Evaluation (1989–2012) of Ramsar Wetland Deepor Beel Using Satellite-Derived Indices. *Environ Monit Assess* **2014**, *186*, 7909–7927, doi:10.1007/s10661-014-3976-2.
206. Mu, S.; Li, B.; Yao, J.; Yang, G.; Wan, R.; Xu, X. Monitoring the Spatio-Temporal Dynamics of the Wetland Vegetation in Poyang Lake by Landsat and MODIS Observations. *Science of The Total Environment* **2020**, *725*, 138096, doi:10.1016/j.scitotenv.2020.138096.
207. Mukherjee, K.; Pal, S.; Mukhopadhyay, M. Impact of Flood and Seasonality on Wetland Changing Trends in the Diara Region of West Bengal, India. *Spat. Inf. Res.* **2018**, *26*, 357–367, doi:10.1007/s41324-018-0177-z.
208. Munishi, S.; Jewitt, G. Degradation of Kilombero Valley Ramsar Wetlands in Tanzania. *Physics and Chemistry of the Earth, Parts A/B/C* **2019**, *112*, 216–227, doi:10.1016/j.pce.2019.03.008.
209. Murray-Hudson, M.; Wolski, P.; Cassidy, L.; Brown, M.T.; Thito, K.; Kashe, K.; Mosimanyana, E. Remote Sensing-Derived Hydroperiod as a Predictor of Floodplain Vegetation Composition. *Wetlands Ecol Manage* **2015**, *23*, 603–616, doi:10.1007/s11273-014-9340-z.
210. Nababa, I.; Symeonakis, E.; Koukoulas, S.; Higginbottom, T.; Cavan, G.; Marsden, S. Land Cover Dynamics and Mangrove Degradation in the Niger Delta Region. *Remote Sensing* **2020**, *12*, 3619, doi:10.3390/rs12213619.
211. Nagel, G.W.; de Moraes Novo, E.M.L.; Martins, V.S.; Campos-Silva, J.V.; Barbosa, C.C.F.; Bonnet, M.P. Impacts of Meander Migration on the Amazon Riverine Communities Using Landsat Time Series and Cloud Computing. *Science of The Total Environment* **2022**, *806*, 150449.
212. Naik, R.; Sharma, L. Spatio-Temporal Modelling for the Evaluation of an Altered Indian Saline Ramsar Site and Its Drivers for Ecosystem Management and Restoration. *PloS one* **2021**, *16*, e0248543.
213. Nannawo, A.S.; Lohani, T.K.; Eshete, A.A. Exemplifying the Effects Using WetSpass Model Depicting the Landscape Modifications on Long-Term Surface and Subsurface Hydrological Water Balance in Bilate Basin, Ethiopia. *Advances in Civil Engineering* **2021**, *2021*.
214. Nasab, F.Q.; Rahnama, M.B. Developing Restoration Strategies in Jazmurian Wetland by Remote Sensing. *Int. J. Environ. Sci. Technol.* **2019**, *17*, 2767–2782, doi:10.1007/s13762-019-02568-0.

215. Näschen, K.; Diekkrüger, B.; Leemhuis, C.; Steinbach, S.; Seregina, L.; Thonfeld, F.; van der Linden, R. Hydrological Modeling in Data-Scarce Catchments: The Kilombero Floodplain in Tanzania. *Water* **2018**, *10*, 599, doi:10.3390/w10050599.
216. Nasser Mohamed Eid, A.; Olatubara, C.O.; Ewemoje, T.A.; Farouk, H.; El-Hennawy, M.T. Coastal Wetland Vegetation Features and Digital Change Detection Mapping Based on Remotely Sensed Imagery: El-Burullus Lake, Egypt. *International Soil and Water Conservation Research* **2020**, *8*, 66–79, doi:10.1016/j.iswcr.2020.01.004.
217. Ndayisaba, F.; Nahayo, L.; Guo, H.; Bao, A.; Kayiranga, A.; Karamage, F.; Nyesheja, E. Mapping and Monitoring the Akagera Wetland in Rwanda. *Sustainability* **2017**, *9*, 174, doi:10.3390/su9020174.
218. Nguyen, H.-H.; McAlpine, C.; Pullar, D.; Johansen, K.; Duke, N.C. The Relationship of Spatial–Temporal Changes in Fringe Mangrove Extent and Adjacent Land-Use: Case Study of Kien Giang Coast, Vietnam. *Ocean & Coastal Management* **2013**, *76*, 12–22, doi:10.1016/j.ocecoaman.2013.01.003.
219. Nguyen, H.T.T.; Hardy, G.E.S.; Le, T.V.; Nguyen, H.Q.; Nguyen, H.H.; Nguyen, T.V.; Dell, B. Mangrove Forest Landcover Changes in Coastal Vietnam: A Case Study from 1973 to 2020 in Thanh Hoa and Nghe An Provinces. *Forests* **2021**, *12*, 637, doi:10.3390/f12050637.
220. Nurwanda, A.; Honjo, T. The Prediction of City Expansion and Land Surface Temperature in Bogor City, Indonesia. *Sustainable Cities and Society* **2020**, *52*, 101772, doi:10.1016/j.scs.2019.101772.
221. O'Donnell, J.P.R.; Schalles, J.F. Examination of Abiotic Drivers and Their Influence on *Spartina Alterniflora* Biomass over a Twenty-Eight Year Period Using Landsat 5 TM Satellite Imagery of the Central Georgia Coast. *Remote Sensing* **2016**, *8*, 477, doi:10.3390/rs8060477.
222. Obiefuna, J.N.; Nwilo, P.C.; Atagbaza, A.O.; Okolie, C.J. Land Cover Dynamics Associated with the Spatial Changes in the Wetlands of Lagos/Lekki Lagoon System of Lagos, Nigeria. *Journal of Coastal Research* **2013**, *29*, 671–679, doi:10.2112/JCOASTRES-D-12-00038.1.
223. Orimoloye, I.R.; Mazinyo, S.P.; Kalumba, A.M.; Nel, W.; Adigun, A.I.; Ololade, O.O. Wetland Shift Monitoring Using Remote Sensing and GIS Techniques: Landscape Dynamics and Its Implications on Isimangaliso Wetland Park, South Africa. *Earth Sci Inform* **2019**, *12*, 553–563, doi:10.1007/s12145-019-00400-4.
224. Orimoloye, I.R.; Kalumba, A.M.; Mazinyo, S.P.; Nel, W. Geospatial Analysis of Wetland Dynamics: Wetland Depletion and Biodiversity Conservation of Isimangaliso Wetland, South Africa. *Journal of King Saud University-Science* **2020**, *32*, 90–96.
225. Otero, V.; Lucas, R.; Van De Kerchove, R.; Satyanarayana, B.; Mohd-Lokman, H.; Dahdouh-Guebas, F. Spatial Analysis of Early Mangrove Regeneration in the Matang Mangrove Forest Reserve, Peninsular Malaysia, Using Geomatics. *Forest Ecology and Management* **2020**, *472*, 118213, doi:10.1016/j.foreco.2020.118213.
226. Otero, V.; Van De Kerchove, R.; Satyanarayana, B.; Mohd-Lokman, H.; Lucas, R.; Dahdouh-Guebas, F. An Analysis of the Early Regeneration of Mangrove Forests Using Landsat Time Series in the Matang Mangrove Forest Reserve, Peninsular Malaysia. *Remote Sensing* **2019**, *11*, 774, doi:10.3390/rs11070774.
227. Ouyang, Z.; Becker, R.; Shaver, W.; Chen, J. Evaluating the Sensitivity of Wetlands to Climate Change with Remote Sensing Techniques. *Hydrological Processes* **2014**, *28*, 1703–1712, doi:10.1002/hyp.9685.
228. Ozturk, D.; Sesli, F.A. Shoreline Change Analysis of the Kizilirmak Lagoon Series. *Ocean & Coastal Management* **2015**, *118*, 290–308, doi:10.1016/j.ocecoaman.2015.03.009.
229. Özyavuz, M. Determination of Temporal Changes in Lakes Mert and Erikli Using Remote Sensing and Geographic Information Systems. *Journal of Coastal Research* **2011**, *27*, 174–181, doi:10.2112/JCOASTRES-D-10-00107.1.

230. Pal, R.; Biswas, S.S.; Pramanik, M.K.; Mondal, B. Bank Vulnerability and Avulsion Modeling of the Bhagirathi-Hugli River between Ajay and Jalangi Confluences in Lower Ganga Plain, India. *Modeling Earth Systems and Environment* **2016**, *2*, 1–10, doi:10.1007/s40808-016-0125-7.
231. Pal, S.; Paul, S. Stability Consistency and Trend Mapping of Seasonally Inundated Wetlands in Moribund Deltaic Part of India. *Environ Dev Sustain* **2021**, *23*, 12925–12953, doi:10.1007/s10668-020-01193-z.
232. Pan, F.; Xie, J.; Lin, J.; Zhao, T.; Ji, Y.; Hu, Q.; Pan, X.; Wang, C.; Xi, X. Evaluation of Climate Change Impacts on Wetland Vegetation in the Dunhuang Yangguan National Nature Reserve in Northwest China Using Landsat Derived NDVI. *Remote Sensing* **2018**, *10*, 735, doi:10.3390/rs10050735.
233. Parihar, S.M.; Sarkar, S.; Dutta, A.; Sharma, S.; Dutta, T. Characterizing Wetland Dynamics: A Post-Classification Change Detection Analysis of the East Kolkata Wetlands Using Open Source Satellite Data. *Geocarto International* **2013**, *28*, 273–287, doi:10.1080/10106049.2012.705337.
234. Pattanaik, C.; Narendra Prasad, S. Assessment of Aquaculture Impact on Mangroves of Mahanadi Delta (Orissa), East Coast of India Using Remote Sensing and GIS. *Ocean & Coastal Management* **2011**, *54*, 789–795, doi:10.1016/j.ocecoaman.2011.07.013.
235. Paul, S.; Pal, S. Exploring Wetland Transformations in Moribund Deltaic Parts of India. *Geocarto International* **2020**, *35*, 1873–1894.
236. Paul, S.; Pal, S. Predicting Wetland Area and Water Depth of Ganges Moribund Deltaic Parts of India. *Remote Sensing Applications: Society and Environment* **2020**, *19*, 100338, doi:10.1016/j.rsase.2020.100338.
237. Pedreros-Guarda, M.; Abarca-del-Río, R.; Escalona, K.; García, I.; Parra, Ó. A Google Earth Engine Application to Retrieve Long-Term Surface Temperature for Small Lakes. Case: San Pedro Lagoons, Chile. *Remote Sensing* **2021**, *13*, 4544.
238. Peneva-Reed, E.I.; Krauss, K.W.; Bullock, E.L.; Zhu, Z.; Woltz, V.L.; Drexler, J.Z.; Conrad, J.R.; Stehman, S.V. Carbon Stock Losses and Recovery Observed for a Mangrove Ecosystem Following a Major Hurricane in Southwest Florida. *Estuarine, Coastal and Shelf Science* **2021**, *248*, 106750.
239. Pereira, G.; Ramos, R. de C.; Rocha, L.C.; Brunzell, N.A.; Merino, E.R.; Mataveli, G.A.V.; Cardozo, F. da S. Rainfall Patterns and Geomorphological Controls Driving Inundation Frequency in Tropical Wetlands: How Does the Pantanal Flood? *Progress in Physical Geography: Earth and Environment* **2021**, *45*, 669–686, doi:10.1177/0309133320987719.
240. Pimple, U.; Simonetti, D.; Hinks, I.; Oszwald, J.; Berger, U.; Pungkul, S.; Leadprathom, K.; Pravinvongvuthi, T.; Maprasoap, P.; Gond, V. A History of the Rehabilitation of Mangroves and an Assessment of Their Diversity and Structure Using Landsat Annual Composites (1987–2019) and Transect Plot Inventories. *Forest Ecology and Management* **2020**, *462*, 118007, doi:10.1016/j.foreco.2020.118007.
241. Pirasteh, S.; Zenner, E.K.; Mafi-Gholami, D.; Jaafari, A.; Nouri Kamari, A.; Liu, G.; Zhu, Q.; Li, J. Modeling Mangrove Responses to Multi-Decadal Climate Change and Anthropogenic Impacts Using a Long-Term Time Series of Satellite Imagery. *International Journal of Applied Earth Observation and Geoinformation* **2021**, *102*, 102390, doi:10.1016/j.jag.2021.102390.
242. Potter, C.; Amer, R. Mapping 30 Years of Change in the Marshlands of Breton Sound Basin (Southeastern Louisiana, USA): Coastal Land Area and Vegetation Green Cover. *Journal of Coastal Research* **2020**, *36*, 437–450.
243. Pujiono, E.; Kwak, D.-A.; Lee, W.-K.; Sulistyanto; Kim, S.-R.; Lee, J.Y.; Lee, S.-H.; Park, T.; Kim, M.-I. RGB-NDVI Color Composites for Monitoring the Change in Mangrove Area at the Maubesi Nature Reserve, Indonesia. *Forest Science and Technology* **2013**, *9*, 171–179, doi:10.1080/21580103.2013.842327.
244. Qiu, P.; Wu, N.; Luo, P.; Wang, Z.; Li, M. Analysis of Dynamics and Driving Factors of Wetland Landscape in Zoige, Eastern Qinghai-Tibetan Plateau. *J. Mt. Sci.* **2009**, *6*, 42–55, doi:10.1007/s11629-009-0230-4.

245. Quader, M.A.; Agrawal, S.; Kervyn, M. Multi-Decadal Land Cover Evolution in the Sundarban, the Largest Mangrove Forest in the World. *Ocean & Coastal Management* **2017**, *139*, 113–124, doi:10.1016/j.ocecoaman.2017.02.008.
246. Quang, N.H.; Quinn, C.H.; Stringer, L.C.; Carrie, R.; Hackney, C.R.; Van Hue, L.T.; Van Tan, D.; Nga, P.T.T. Multi-Decadal Changes in Mangrove Extent, Age and Species in the Red River Estuaries of Viet Nam. *Remote Sensing* **2020**, *12*, 2289, doi:10.3390/rs12142289.
247. Rakotomavo, A.; Fromard, F. Dynamics of Mangrove Forests in the Mangoky River Delta, Madagascar, under the Influence of Natural and Human Factors. *Forest Ecology and Management* **2010**, *259*, 1161–1169, doi:10.1016/j.foreco.2010.01.002.
248. Raynolds, M.K.; Walker, D.A. Increased Wetness Confounds Landsat-Derived NDVI Trends in the Central Alaska North Slope Region, 1985–2011. *Environ. Res. Lett.* **2016**, *11*, 085004, doi:10.1088/1748-9326/11/8/085004.
249. Reddy, C.S.; Pasha, S.V.; Jha, C.S. Spatio-Temporal Changes Associated with Natural and Anthropogenic Factors in Wetlands of Great Rann of Kachchh, India. *J Coast Conserv* **2016**, *20*, 145–155, doi:10.1007/s11852-016-0425-0.
250. Renó, V.F.; Novo, E.M.L.M.; Suemitsu, C.; Rennó, C.D.; Silva, T.S.F. Assessment of Deforestation in the Lower Amazon Floodplain Using Historical Landsat MSS/TM Imagery. *Remote Sensing of Environment* **2011**, *115*, 3446–3456, doi:10.1016/j.rse.2011.08.008.
251. Rosen, T.; Xu, Y.J. Estimation of Sedimentation Rates in the Distributary Basin of the Mississippi River, the Atchafalaya River Basin, USA. *Hydrology Research* **2015**, *46*, 244–257, doi:10.2166/nh.2013.181.
252. Rossi, R.E.; Archer, S.K.; Giri, C.; Layman, C.A. The Role of Multiple Stressors in a Dwarf Red Mangrove (*Rhizophora Mangle*) Dieback. *Estuarine, Coastal and Shelf Science* **2020**, *237*, 106660, doi:10.1016/j.ecss.2020.106660.
253. Samuel, K.J.; Atobatele, R.E. Change in Administrative Status, Urban Growth, and Land Use/Cover in a Medium-Sized African City. *Human Geographies* **2019**, *13*, 5–22.
254. Schaffer-Smith, D.; Swenson, J.J.; Barbaree, B.; Reiter, M.E. Three Decades of Landsat-Derived Spring Surface Water Dynamics in an Agricultural Wetland Mosaic; Implications for Migratory Shorebirds. *Remote Sensing of Environment* **2017**, *193*, 180–192, doi:10.1016/j.rse.2017.02.016.
255. Schwatke, C.; Scherer, D.; Dettmering, D. Automated Extraction of Consistent Time-Variable Water Surfaces of Lakes and Reservoirs Based on Landsat and Sentinel-2. *Remote Sensing* **2019**, *11*, 1010, doi:10.3390/rs11091010.
256. Shaeri Karimi, S.; Saintilan, N.; Wen, L.; Cox, J. Spatio-Temporal Effects of Inundation and Climate on Vegetation Greenness Dynamics in Dryland Floodplains. *Ecohydrology* **2021**, e2378.
257. Sharma, G.; Patnaik, K.V.K.R.K. Assessment of Coringa Mangrove Shoreline Migration Using Geospatial Techniques. *Journal of Operational Oceanography* **2020**, 1–10, doi:10.1080/1755876X.2020.1840245.
258. Shewit, G.; Minwyelet, M.; Tesfaye, M.; Lewoye, T.; Ferehiwot, M. Land Use Change and Its Drivers in Kurt Bahir Wetland, North-Western Ethiopia. *African Journal of Aquatic Science* **2017**, *42*, 45–54, doi:10.2989/16085914.2017.1292178.
259. Shi, S.; Chang, Y.; Li, Y.; Hu, Y.; Liu, M.; Ma, J.; Xiong, Z.; Wen, D.; Li, B.; Zhang, T. Using Time Series Optical and SAR Data to Assess the Impact of Historical Wetland Change on Current Wetland in Zhenlai County, Jilin Province, China. *Remote Sensing* **2021**, *13*, 4514.
260. Shi, S.; Chang, Y.; Wang, G.; Li, Z.; Hu, Y.; Liu, M.; Li, Y.; Li, B.; Zong, M.; Huang, W. Planning for the Wetland Restoration Potential Based on the Viability of the Seed Bank and the Land-Use Change Trajectory in the Sanjiang Plain of China. *Science of The Total Environment* **2020**, *733*, 139208, doi:10.1016/j.scitotenv.2020.139208.

261. Sibanda, S.; Ahmed, F. Modelling Historic and Future Land Use/Land Cover Changes and Their Impact on Wetland Area in Shashe Sub-Catchment, Zimbabwe. *Model. Earth Syst. Environ.* **2020**, *7*, 57–70, doi:10.1007/s40808-020-00963-y.
262. Silio-Calzada, A.; Barquín, J.; Huszar, V.L.M.; Mazzeo, N.; Méndez, F.; Álvarez-Martínez, J.M. Long-Term Dynamics of a Floodplain Shallow Lake in the Pantanal Wetland: Is It All about Climate? *Science of The Total Environment* **2017**, *605–606*, 527–540, doi:10.1016/j.scitotenv.2017.06.183.
263. Sohel, Md.S.I.; Hore, S.K.; Salam, M.A.; Hoque, M.A.; Ahmed, N.; Rahman, M.M.; Khan, H.M.; Rahman, S. Analysis of Erosion–Accretion Dynamics of Major Rivers of World’s Largest Mangrove Forest Using Geospatial Techniques. *Regional Studies in Marine Science* **2021**, *46*, 101901, doi:10.1016/j.rsma.2021.101901.
264. Soliman, G.A.A.; Soussa, H. Wetland Change Detection in Nile Swamps of Southern Sudan Using Multitemporal Satellite Imagery. *JARS* **2011**, *5*, 053517, doi:10.1117/1.3571009.
265. Son, N.T.; Thanh, B.X.; Da, C.T. Monitoring Mangrove Forest Changes from Multi-Temporal Landsat Data in Can Gio Biosphere Reserve, Vietnam. *Wetlands* **2016**, *36*, 565–576, doi:10.1007/s13157-016-0767-2.
266. Son, N.-T.; Chen, C.-F.; Chang, N.-B.; Chen, C.-R.; Chang, L.-Y.; Thanh, B.-X. Mangrove Mapping and Change Detection in Ca Mau Peninsula, Vietnam, Using Landsat Data and Object-Based Image Analysis. *IEEE Journal of Selected Topics in Applied Earth Observations and Remote Sensing* **2015**, *8*, 503–510, doi:10.1109/JSTARS.2014.2360691.
267. Song, K.; Wang, Z.; Du, J.; Liu, L.; Zeng, L.; Ren, C. Wetland Degradation: Its Driving Forces and Environmental Impacts in the Sanjiang Plain, China. *Environmental Management* **2014**, *2*, 255–271, doi:10.1007/s00267-014-0278-y.
268. Song, K.; Wang, Z.; Li, L.; Tedesco, L.; Li, F.; Jin, C.; Du, J. Wetlands Shrinkage, Fragmentation and Their Links to Agriculture in the Muleng–Xingkai Plain, China. *Journal of Environmental Management* **2012**, *111*, 120–132, doi:10.1016/j.jenvman.2012.06.038.
269. Soto, J.; Román-Figueroa, C.; Paneque, M. A Model for Estimating the Vegetation Cover in the High-Altitude Wetlands of the Andes (HAWA). *Land* **2019**, *8*, 20, doi:10.3390/land8010020.
270. Sullivan, D.G.; White, J.G.; Vepraskas, M. Assessing Carolina Bay Wetland Restoration Risks to Downstream Water Quality by Characterizing Land Use and Stream Proximity. *Wetlands* **2019**, *39*, 495–506, doi:10.1007/s13157-018-1095-5.
271. Sun, C.; Fagherazzi, S.; Liu, Y. Classification Mapping of Salt Marsh Vegetation by Flexible Monthly NDVI Time-Series Using Landsat Imagery. *Estuarine, Coastal and Shelf Science* **2018**, *213*, 61–80, doi:10.1016/j.ecss.2018.08.007.
272. Suyadi; Gao, J.; Lundquist, C.J.; Schwendenmann, L. Land-based and Climatic Stressors of Mangrove Cover Change in the Auckland Region, New Zealand. *Aquatic Conserv: Mar Freshw Ecosyst* **2019**, *29*, 1466–1483, doi:10.1002/aqc.3146.
273. Tahsin, S.; Medeiros, S.C.; Singh, A. Wetland Dynamics Inferred from Spectral Analyses of Hydro-Meteorological Signals and Landsat Derived Vegetation Indices. *Remote Sensing* **2019**, *12*, 12, doi:10.3390/rs12010012.
274. Talukdar, G.; Sarma, A.K.; Bhattacharjya, R.K. Mapping Agricultural Activities and Their Temporal Variations in the Riverine Ecosystem of the Brahmaputra River Using Geospatial Techniques. *Remote Sensing Applications: Society and Environment* **2020**, *20*, 100423, doi:10.1016/j.rsase.2020.100423.

275. Tang, Z.; Li, Y.; Gu, Y.; Jiang, W.; Xue, Y.; Hu, Q.; LaGrange, T.; Bishop, A.; Drahota, J.; Li, R. Assessing Nebraska Playa Wetland Inundation Status during 1985–2015 Using Landsat Data and Google Earth Engine. *Environ Monit Assess* **2016**, *188*, 654, doi:10.1007/s10661-016-5664-x.
276. Tania, A.H.; Gazi, Md.Y.; Mia, Md.B. Evaluation of Water Quantity–Quality, Floodplain Landuse, and Land Surface Temperature (LST) of Turag River in Bangladesh: An Integrated Approach of Geospatial, Field, and Laboratory Analyses. *SN Appl. Sci.* **2021**, *3*, 63, doi:10.1007/s42452-020-04011-3.
277. Taravat, A.; Rajaei, M.; Emadodin, I.; Hasheminejad, H.; Mousavian, R.; Biniyaz, E. A Spaceborne Multisensory, Multitemporal Approach to Monitor Water Level and Storage Variations of Lakes. *Water* **2016**, *8*, 478, doi:10.3390/w8110478.
278. Teferi, E.; Uhlenbrook, S.; Bewket, W.; Wenninger, J.; Simane, B. The Use of Remote Sensing to Quantify Wetland Loss in the Choke Mountain Range, Upper Blue Nile Basin, Ethiopia. *Hydrology and Earth System Sciences* **2010**, *14*, 2415–2428, doi:10.5194/hess-14-2415-2010.
279. ter Borg, R.N.; Barron, J. Development of Constructed Wetlands in Agricultural Landscapes Using Remote Sensing Techniques. *Acta Agriculturae Scandinavica, Section B—Soil & Plant Science* **2021**, 1–16.
280. Thakur, S.; Mondal, I.; Bar, S.; Nandi, S.; Ghosh, P.B.; Das, P.; De, T.K. Shoreline Changes and Its Impact on the Mangrove Ecosystems of Some Islands of Indian Sundarbans, North-East Coast of India. *Journal of Cleaner Production* **2021**, *284*, 124764.
281. Thomas, R.F.; Kingsford, R.T.; Lu, Y.; Hunter, S.J. Landsat Mapping of Annual Inundation (1979–2006) of the Macquarie Marshes in Semi-Arid Australia. *International Journal of Remote Sensing* **2011**, *32*, 4545–4569, doi:10.1080/01431161.2010.489064.
282. Thomas, R.F.; Kingsford, R.T.; Lu, Y.; Cox, S.J.; Sims, N.C.; Hunter, S.J. Mapping Inundation in the Heterogeneous Floodplain Wetlands of the Macquarie Marshes, Using Landsat Thematic Mapper. *Journal of Hydrology* **2015**, *524*, 194–213, doi:10.1016/j.jhydrol.2015.02.029.
283. Tian, B.; Zhou, Y.-X.; Thom, R.M.; Diefenderfer, H.L.; Yuan, Q. Detecting Wetland Changes in Shanghai, China Using FORMOSAT and Landsat TM Imagery. *Journal of Hydrology* **2015**, *529*, 1–10, doi:10.1016/j.jhydrol.2015.07.007.
284. Tian, Y.; Luo, L.; Mao, D.; Wang, Z.; Li, L.; Liang, J. Using Landsat Images to Quantify Different Human Threats to the Shuangtai Estuary Ramsar Site, China. *Ocean & Coastal Management* **2017**, *135*, 56–64, doi:10.1016/j.ocecoaman.2016.11.011.
285. Tibebu Kassawmar, N.; Ram Mohan Rao, K.; Lemlem Abraha, G. An Integrated Approach for Spatio-Temporal Variability Analysis of Wetlands: A Case Study of Abaya and Chamo Lakes, Ethiopia. *Environ Monit Assess* **2011**, *180*, 313–324, doi:10.1007/s10661-010-1790-z.
286. Tin, H.C.; Ni, T.N.K.; Tuan, L.V.; Saizen, I.; Catherman, R. Spatial and Temporal Variability of Mangrove Ecosystems in the Cu Lao Cham-Hoi An Biosphere Reserve, Vietnam. *Regional Studies in Marine Science* **2019**, *27*, 100550, doi:10.1016/j.rsma.2019.100550.
287. Tiné, M.; Perez, L.; Molowny-Horas, R.; Darveau, M. Hybrid Spatiotemporal Simulation of Future Changes in Open Wetlands: A Study of the Abitibi-Témiscamingue Region, Québec, Canada. *International Journal of Applied Earth Observation and Geoinformation* **2019**, *74*, 302–313, doi:10.1016/j.jag.2018.10.001.
288. Toosi, N.B.; Soffianian, A.R.; Fakheran, S.; Pourmanafi, S.; Ginzler, C.; Waser, L.T. Comparing Different Classification Algorithms for Monitoring Mangrove Cover Changes in Southern Iran. *Global Ecology and Conservation* **2019**, *19*, e00662, doi:10.1016/j.gecco.2019.e00662.

289. Tope-Ajayi, O.O.; Adedeji, O.H.; Adeofun, C.O.; Awokola, S.O. Land Use Change Assessment, Prediction Using Remote Sensing, and Gis Aided Markov Chain Modelling at Eleyele Wetland Area, Nigeria. *Journal of Settlements and Spatial Planning* **2016**, *7*, 51–63.
290. Tran, H.; Tran, T.; Kervyn, M. Dynamics of Land Cover/Land Use Changes in the Mekong Delta, 1973–2011: A Remote Sensing Analysis of the Tran Van Thoi District, Ca Mau Province, Vietnam. *Remote Sensing* **2015**, *7*, 2899–2925, doi:10.3390/rs70302899.
291. Tran Thi, V.; Tien Thi Xuan, A.; Phan Nguyen, H.; Dahdouh-Guebas, F.; Koedam, N. Application of Remote Sensing and GIS for Detection of Long-Term Mangrove Shoreline Changes in Mui Ca Mau, Vietnam. *Biogeosciences* **2014**, *11*, 3781–3795, doi:10.5194/bg-11-3781-2014.
292. Tuholske, C.; Tane, Z.; López-Carr, D.; Roberts, D.; Cassels, S. Thirty Years of Land Use/Cover Change in the Caribbean: Assessing the Relationship between Urbanization and Mangrove Loss in Roatán, Honduras. *Applied Geography* **2017**, *88*, 84–93, doi:10.1016/j.apgeog.2017.08.018.
293. Umarhadi, D.A.; Widyatmanti, W.; Kumar, P.; Yunus, A.P.; Khedher, K.M.; Kharrazi, A.; Avtar, R. Tropical Peat Subsidence Rates Are Related to Decadal LULC Changes: Insights from InSAR Analysis. *Science of The Total Environment* **2022**, *816*, 151561, doi:10.1016/j.scitotenv.2021.151561.
294. Utami, W.; Wibowo, Y.A.; Hadi, A.H.; Permadi, F.B. The Impact of Mangrove Damage on Tidal Flooding in the Subdistrict of Tugu, Semarang, Central Java. *Journal of Degraded and Mining Lands Management* **2021**, *9*, 3093.
295. Valderrama-Landeros, L.; Blanco y Correa, M.; Flores-Verdugo, F.; Álvarez-Sánchez, L.F.; Flores-de-Santiago, F. Spatiotemporal Shoreline Dynamics of Marismas Nacionales, Pacific Coast of Mexico, Based on a Remote Sensing and GIS Mapping Approach. *Environ Monit Assess* **2020**, *192*, 123, doi:10.1007/s10661-020-8094-8.
296. Vanderhoof, M.K.; Lane, C.R.; McManus, M.G.; Alexander, L.C.; Christensen, J.R. Wetlands Inform How Climate Extremes Influence Surface Water Expansion and Contraction. *Hydrol. Earth Syst. Sci.* **2018**, *22*, 1851–1873, doi:10.5194/hess-22-1851-2018.
297. Veettil, B.K.; Florêncio de Souza, S.; Simões, J.C.; Ruiz Pereira, S.F. Decadal Evolution of Glaciers and Glacial Lakes in the Apolobamba–Carabaya Region, Tropical Andes (Bolivia–Peru). *Geografiska Annaler: Series A, Physical Geography* **2017**, *99*, 193–206, doi:10.1080/04353676.2017.1299577.
298. Veettil, B.K.; Van, D.D.; Quang, N.X.; Hoai, P.N. Spatiotemporal Dynamics of Mangrove Forests in the Andaman and Nicobar Islands (India). *Regional Studies in Marine Science* **2020**, *39*, 101455, doi:10.1016/j.rsma.2020.101455.
299. Veettil, B.; Quang, N. Mangrove Forests of Cambodia: Recent Changes and Future Threats. *Ocean & Coastal Management* **2019**, *181*, 104895, doi:10.1016/j.ocecoaman.2019.104895.
300. Vijay, R.; Dey, J.; Sakhre, S.; Kumar, R. Impact of Urbanization on Creeks of Mumbai, India: A Geospatial Assessment Approach. *J Coast Conserv* **2020**, *24*, 4, doi:10.1007/s11852-019-00721-y.
301. Villate Daza, D.A.; Sánchez Moreno, H.; Portz, L.; Portantiolo Manzolli, R.; Bolívar-Anillo, H.J.; Anfuso, G. Mangrove Forests Evolution and Threats in the Caribbean Sea of Colombia. *Water* **2020**, *12*, 1113, doi:10.3390/w12041113.
302. Waiyasusri, K. Monitoring the Land Cover Changes in Mangrove Areas and Urbanization Using Normalized Difference Vegetation Index and Normalized Difference Built-up Index in Krabi Estuary Wetland, Krabi Province, Thailand. *Applied Environmental Research* **2021**, *43*, 1–16.
303. Wan, L.; Zhang, Y.; Zhang, X.; Qi, S.; Na, X. Comparison of Land Use/Land Cover Change and Landscape Patterns in Honghe National Nature Reserve and the Surrounding Jiansanjiang Region, China. *Ecological Indicators* **2015**, *51*, 205–214, doi:10.1016/j.ecolind.2014.11.025.

304. Wang, D.; Gao, S.; Zhao, Y.; Chatzipavlis, A.; Chen, Y.; Gao, J.; Zhao, Y. An Eco-Parametric Method to Derive Sedimentation Rates for Coastal Saltmarshes. *Science of The Total Environment* **2021**, *770*, 144756, doi:10.1016/j.scitotenv.2020.144756.
305. Wang, P.; Numere, A.O.; Camilo, G.R. Long-Term Changes in Mangrove Landscape of the Niger River Delta, Nigeria. *American Journal of Environmental Sciences* **2016**, *12*, 248–259, doi:10.3844/ajessp.2016.248.259.
306. Wang, S.; Zhang, L.; Zhang, H.; Han, X.; Zhang, L. Spatial–Temporal Wetland Landcover Changes of Poyang Lake Derived from Landsat and HJ-1A/B Data in the Dry Season from 1973–2019. *Remote Sensing* **2020**, *12*, 1595.
307. Wang, X.; Xiao, X.; Xu, X.; Zou, Z.; Chen, B.; Qin, Y.; Zhang, X.; Dong, J.; Liu, D.; Pan, L.; et al. Rebound in China’s Coastal Wetlands Following Conservation and Restoration. *Nat Sustain* **2021**, *4*, 1076–1083, doi:10.1038/s41893-021-00793-5.
308. Ward, D.P.; Petty, A.; Setterfield, S.A.; Douglas, M.M.; Ferdinands, K.; Hamilton, S.K.; Phinn, S. Floodplain Inundation and Vegetation Dynamics in the Alligator Rivers Region (Kakadu) of Northern Australia Assessed Using Optical and Radar Remote Sensing. *Remote Sensing of Environment* **2014**, *147*, 43–55, doi:10.1016/j.rse.2014.02.009.
309. Watchorn, K.E.; Goldsborough, G.; Hudon, C.; Taranu, Z.E. Emergent Vegetation in Netley-Libau Marsh: Temporal Changes (1990–2013) in Cover in Relation to Lake Winnipeg Level and Red River Flow. *Journal of Great Lakes Research* **2021**, *47*, 690–702.
310. Wei, Q.; Shao, Y.; Xie, C.; Cui, B.; Tian, B.; Brisco, B.; Li, K.; Tang, W. Number and Nest-Site Selection of Breeding Black-Necked Cranes over the Past 40 Years in the Longbao Wetland Nature Reserve, Qinghai, China. *Big Earth Data* **2021**, *5*, 217–236.
311. Wells, A.F.; Frost, G.V.; Macander, M.J.; Jorgenson, M.T.; Roth, J.E.; Davis, W.A.; Pullman, E.R. Integrated Terrain Unit Mapping on the Beaufort Coastal Plain, North Slope, Alaska, USA. *Landscape Ecol* **2021**, *36*, 549–579, doi:10.1007/s10980-020-01154-x.
312. Wen, C.; Dong, W.; Meng, Y.; Li, C.; Zhang, Q. Application of a Loose Coupling Model for Assessing the Impact of Land-Cover Changes on Groundwater Recharge in the Jinan Spring Area, China. *Environ Earth Sci* **2019**, *78*, 382, doi:10.1007/s12665-019-8388-8.
313. Wilson, N.R.; Norman, L.M. Analysis of Vegetation Recovery Surrounding a Restored Wetland Using the Normalized Difference Infrared Index (NDII) and Normalized Difference Vegetation Index (NDVI). *International Journal of Remote Sensing* **2018**, *39*, 3243–3274.
314. Wilson, N.R.; Norman, L.M.; Villarreal, M.; Gass, L.; Tiller, R.; Salywon, A. Comparison of Remote Sensing Indices for Monitoring of Desert Cienegas. *Arid Land Research and Management* **2016**, *30*, 460–478, doi:10.1080/15324982.2016.1170076.
315. Wu, W.; Zhou, Y.; Tian, B. Coastal Wetlands Facing Climate Change and Anthropogenic Activities: A Remote Sensing Analysis and Modelling Application. *Ocean & Coastal Management* **2017**, *138*, 1–10, doi:10.1016/j.ocecoaman.2017.01.005.
316. Wu, W.; Zhao, Z.; Mao, Y. A Comparative Study on the Dynamics and Geologic Conditions of Wetlands in Shangri-La County and Lijiang City in Northwestern Yunnan Plateau. *International Journal of Sustainable Development & World Ecology* **2015**, *22*, 151–155, doi:10.1080/13504509.2014.925520.
317. Wu, W.; Yang, Z.; Tian, B.; Huang, Y.; Zhou, Y.; Zhang, T. Impacts of Coastal Reclamation on Wetlands: Loss, Resilience, and Sustainable Management. *Estuarine, Coastal and Shelf Science* **2018**, *210*, 153–161, doi:10.1016/j.ecss.2018.06.013.

318. Wu, Y.; Xiao, X.; Chen, B.; Ma, J.; Wang, X.; Zhang, Y.; Zhao, B.; Li, B. Tracking the Phenology and Expansion of *Spartina Alterniflora* Coastal Wetland by Time Series MODIS and Landsat Images. *Multimed Tools Appl* **2018**, *79*, 5175–5195, doi:10.1007/s11042-018-6314-9.
319. Wulder, M.A.; Li, Z.; Campbell, E.M.; White, J.C.; Hobart, G.; Hermosilla, T.; Coops, N.C. A National Assessment of Wetland Status and Trends for Canada's Forested Ecosystems Using 33 Years of Earth Observation Satellite Data. *Remote Sensing* **2018**, *10*, 1623.
320. Xiao, H.; Su, F.; Fu, D.; Wang, Q.; Huang, C. Coastal Mangrove Response to Marine Erosion: Evaluating the Impacts of Spatial Distribution and Vegetation Growth in Bangkok Bay from 1987 to 2017. *Remote Sensing* **2020**, *12*, 220, doi:10.3390/rs12020220.
321. Xie, C.; Huang, X.; Mu, H.; Yin, W. Impacts of Land-Use Changes on the Lakes across the Yangtze Floodplain in China. *Environ. Sci. Technol.* **2017**, *51*, 3669–3677, doi:10.1021/acs.est.6b04260.
322. Xie, Z.; Liu, J.; Ma, Z.; Duan, X.; Cui, Y. Effect of Surrounding Land-Use Change on the Wetland Landscape Pattern of a Natural Protected Area in Tianjin, China. *International Journal of Sustainable Development & World Ecology* **2012**, *19*, 16–24, doi:10.1080/13504509.2011.583697.
323. Xie, Z.; Xu, L.; Duan, X.; Xu, X. Analysis of Boundary Adjustments and Land Use Policy Change – A Case Study of Tianjin Palaeocoast and Wetland National Natural Reserve, China. *Ocean & Coastal Management* **2012**, *56*, 56–63, doi:10.1016/j.ocecoaman.2011.06.010.
324. Xie, Z.; Huete, A.; Ma, X.; Restrepo-Coupe, N.; Devadas, R.; Clarke, K.; Lewis, M. Landsat and GRACE Observations of Arid Wetland Dynamics in a Dryland River System under Multi-Decadal Hydroclimatic Extremes. *Journal of Hydrology* **2016**, *543*, 818–831, doi:10.1016/j.jhydrol.2016.11.001.
325. Yan, D.; Li, J.; Yao, X.; Luan, Z. Quantifying the Long-Term Expansion and Dieback of *Spartina Alterniflora* Using Google Earth Engine and Object-Based Hierarchical Random Forest Classification. *IEEE Journal of Selected Topics in Applied Earth Observations and Remote Sensing* **2021**, *14*, 9781–9793.
326. Yang, L.; Wang, L.; Yu, D.; Yao, R.; Li, C.; He, Q.; Wang, S.; Wang, L. Four Decades of Wetland Changes in Dongting Lake Using Landsat Observations during 1978–2018. *Journal of Hydrology* **2020**, *587*, 124954, doi:10.1016/j.jhydrol.2020.124954.
327. Yesquen, D.L.N.; Ayala, K.K.L.; Olivera, C.C.; Nakayo, J.L.J.; Flores, J.W.V.; Farfan, E.R.E. Impact of Climate Variability on the Ecological Components of a Swamp: The Case of Pantanos De Villa, Peru. *Chemical Engineering Transactions* **2021**, *86*, 493–498.
328. You, H.; Xu, L.; Liu, G.; Wang, X.; Wu, Y.; Jiang, J. Effects of Inter-Annual Water Level Fluctuations on Vegetation Evolution in Typical Wetlands of Poyang Lake, China. *Wetlands* **2015**, *35*, 931–943, doi:10.1007/s13157-015-0684-9.
329. Yu, H.; Zhang, F.; Kung, H.; Johnson, V.C.; Bane, C.S.; Wang, J.; Ren, Y.; Zhang, Y. Analysis of Land Cover and Landscape Change Patterns in Ebinur Lake Wetland National Nature Reserve, China from 1972 to 2013. *Wetlands Ecol Manage* **2017**, *25*, 619–637, doi:10.1007/s11273-017-9541-3.
330. Yushanjiang, A.; Zhang, F.; Kung, H.; Li, Z. Spatial–Temporal Variation of Ecosystem Service Values in Ebinur Lake Wetland National Natural Reserve from 1972 to 2016, Xinjiang, Arid Region of China. *Environ Earth Sci* **2018**, *77*, 586, doi:10.1007/s12665-018-7764-0.
331. Zefrehei, A.R.P.; Aliakba, H.; Saeid, P.; Omid, B.K.; Rasoul, G. Detection and Prediction of Water Body and Aquatic Plants Cover Changes of Choghakhor International Wetland, Using Landsat Imagery and the Cellular Automata–Markov Model. *Contemp. Probl. Ecol.* **2020**, *13*, 545–555, doi:10.1134/S1995425520050091.
332. Zefrehei, A.R.P.; Fallah, M.; Hedayati, A. Applying Remote Sensing Techniques to Changes of Water Body and Aquatic Plants in Anzali International Wetland (1985–2018). *Theoretical and Applied Ecology* **2021**, 65–72.

333. Zefrehei, A.R.P.; Hedayati, A.; Fallah, M. Mapping Changes of Water Quality Parameters Pattern in Anzali International Wetland Using Remote Sensing. *Journal of Water and Environment Technology* **2021**, *19*, 130–138.
334. Zefrehei, A.R.P.; Hedayati, A.; Pourmanafi, S.; Kashkooli, O.B.; Ghorbani, R. Monitoring Spatiotemporal Variability of Water Quality Parameters Using Landsat Imagery in Choghakhor International Wetland during the Last 32 Years. *Ann. Limnol. - Int. J. Lim.* **2020**, *56*, 6, doi:10.1051/limn/2020004.
335. Zelelew, S.A.; Abebe, W.B.; Amsalu, T. Land-Use Cover Change Impact on Cranes Nesting Space in the Lake Tana Biosphere Reserve Area, Blue Nile Basin. *Wetlands Ecol Manage* **2021**, *29*, 495–505, doi:10.1007/s11273-021-09796-7.
336. Zhang, B.; Zhang, Q.; Feng, C.; Feng, Q.; Zhang, S. Understanding Land Use and Land Cover Dynamics from 1976 to 2014 in Yellow River Delta. *Land* **2017**, *6*, 20, doi:10.3390/land6010020.
337. Zhang, J.; Zhang, Y.; Lloyd, H.; Zhang, Z.; Li, D. Rapid Reclamation and Degradation of Suaeda Salsa Saltmarsh along Coastal China's Northern Yellow Sea. *Land* **2021**, *10*, 835.
338. Zhang, K.; Thapa, B.; Ross, M.; Gann, D. Remote Sensing of Seasonal Changes and Disturbances in Mangrove Forest: A Case Study from South Florida. *Ecosphere* **2016**, *7*, e01366, doi:10.1002/ecs2.1366.
339. Zhang, S.; Zhang, W.; Zhang, L.; Qi, Q.; Xu, F.; Huang, W. Analysis of Water Area in Caoheidian Wetland in 1984–2013 Based on Remote Sensing Image Data. *Environmental Engineering and Management Journal* **2019**, *18*, 1347–1355.
340. Zhang, S.; Na, X.; Kong, B.; Wang, Z.; Jiang, H.; Yu, H.; Zhao, Z.; Li, X.; Liu, C.; Dale, P. Identifying Wetland Change in China's Sanjiang Plain Using Remote Sensing. *Wetlands* **2009**, *29*, 302, doi:10.1672/08-04.1.
341. Zhang, X.; Zhang, Y.; Zhu, L.; Chi, W.; Yang, Z.; Wang, B.; Lv, K.; Wang, H.; Lu, Z. Spatial-Temporal Evolution of the Eastern Nanhui Mudflat in the Changjiang (Yangtze River) Estuary under Intensified Human Activities. *Geomorphology* **2018**, *309*, 38–50.
342. Zhang, Z.; Lei, L.; He, Z.; Su, Y.; Li, L.; Wang, X.; Guo, X. Tracking Changing Evidences of Water in Wetland Using the Satellite Long-Term Observations from 1984 to 2017. *Water* **2020**, *12*, 1602, doi:10.3390/w12061602.
343. Zhang, Z.; Ke, C. Monitoring and Analysis of Changes in a Wetland Landscape in Xingzi County. *Earth Sci Inform* **2016**, *9*, 35–45, doi:10.1007/s12145-015-0232-4.
344. Zhao, C.; Gong, J.; Zeng, Q.; Yang, M.; Wang, Y. Landscape Pattern Evolution Processes and the Driving Forces in the Wetlands of Lake Baiyangdian. *Sustainability* **2021**, *13*, 9747.
345. Zhao, G.; Ye, S.; Li, G.; Yu, X.; McClellan, S.A. Soil Organic Carbon Storage Changes in Coastal Wetlands of the Liaohe Delta, China, Based on Landscape Patterns. *Estuaries and Coasts* **2017**, *40*, 967–976, doi:10.1007/s12237-016-0194-x.
346. Zhao, H.; Wang, X.; Cai, Y.; Liu, W. Wetland Transitions and Protection under Rapid Urban Expansion: A Case Study of Pearl River Estuary, China. *Sustainability* **2016**, *8*, 471, doi:10.3390/su8050471.
347. Zheng, L.; Xu, J.; Tan, Z.; Xu, G.; Xu, L.; Wang, X. A Thirty-Year Landsat Study Reveals Changes to a River-Lake Junction Ecosystem after Implementation of the Three Gorges Dam. *Journal of Hydrology* **2020**, *589*, 125185, doi:10.1016/j.jhydrol.2020.125185.
348. Zheng, L.; Xu, J.; Wang, D.; Xu, G.; Tan, Z.; Xu, L.; Wang, X. Acceleration of Vegetation Dynamics in Hydrologically Connected Wetlands Caused by Dam Operation. *Hydrological Processes* **2021**, *35*, doi:10.1002/hyp.14026.

349. Zheng, Z.; Li, Y.; Guo, Y.; Xu, Y.; Liu, G.; Du, C. Landsat-Based Long-Term Monitoring of Total Suspended Matter Concentration Pattern Change in the Wet Season for Dongting Lake, China. *Remote Sensing* **2015**, *7*, 13975–13999, doi:10.3390/rs71013975.
350. Zhu, B.; Liao, J.; Shen, G. Combining Time Series and Land Cover Data for Analyzing Spatio-Temporal Changes in Mangrove Forests: A Case Study of Qinglangang Nature Reserve, Hainan, China. *Ecological Indicators* **2021**, *131*, 108135, doi:10.1016/j.ecolind.2021.108135.
351. Zhu, C.; Zhang, X.; Huang, Q. Four Decades of Estuarine Wetland Changes in the Yellow River Delta Based on Landsat Observations Between 1973 and 2013. *Water* **2018**, *10*, 933, doi:10.3390/w10070933.
