# Supplementary material for: Long-Term Wetland Monitoring Using the Landsat Archive: A Review
Source: MDPI journal article supplement (doi:10.3390/rs15030820), 2023-01-31
Supplement: s1 [file s1 › Supplementary_Table_S4.pdf]

**Table S4.** Ramsar Classification System of wetlands [1]. A single asterisk (\*) indicates floodplain wetlands, such as seasonally flooded grasslands (including natural wet meadows), shrublands, woodlands, or forests. Double asterisks (\*\*) indicate intensively managed or grazed wet meadows or pastures.

| Level 1                        | Level 2 | Description                                                                                                                               |
|--------------------------------|---------|-------------------------------------------------------------------------------------------------------------------------------------------|
| Marine/<br>Coastal<br>wetlands | A       | Permanent shallow marine waters less than six meters deep at low tide;<br>includes sea bays and straits                                   |
|                                | B       | Marine subtidal aquatic beds; includes kelp beds, sea-grass beds, tropical<br>marine meadows                                              |
|                                | C       | Coral reefs                                                                                                                               |
|                                | D       | Rocky marine shores; includes rocky offshore islands, sea cliffs                                                                          |
|                                | E       | Sand, shingle or pebble shores; includes sand bars, spits and sandy islets;<br>includes dune systems                                      |
|                                | F       | Estuarine waters; permanent water of estuaries and estuarine systems of deltas                                                            |
|                                | G       | Intertidal mud, sand or salt flats                                                                                                        |
|                                | H       | Intertidal marshes; includes salt marshes, salt meadows, saltings, raised salt<br>marshes; includes tidal brackish and freshwater marshes |
|                                | I       | Intertidal forested wetlands; includes mangrove swamps, nipah swamps and<br>tidal freshwater swamp forests                                |
|                                | J       | Coastal brackish/saline lagoons; brackish to saline lagoons with at least one<br>relatively narrow connection to the sea                  |
| Inland<br>wetlands             | K       | Coastal freshwater lagoons; includes freshwater delta lagoons                                                                             |
|                                | L       | Permanent inland deltas                                                                                                                   |
|                                | M       | Permanent rivers/streams/creeks; includes waterfalls                                                                                      |
|                                | N       | Seasonal/intermittent/irregular rivers/streams/creeks                                                                                     |
|                                | O       | Permanent freshwater lakes (over 8 ha); includes large oxbow lakes                                                                        |
|                                | P       | Seasonal/intermittent freshwater lakes (over 8 ha); includes floodplain lakes                                                             |
|                                | Q       | Permanent saline/brackish/alkaline lakes                                                                                                  |

|                     |    |                                                                                                                                                                              |
|---------------------|----|------------------------------------------------------------------------------------------------------------------------------------------------------------------------------|
|                     | R  | Seasonal/intermittent saline/brackish/alkaline lakes and flats*                                                                                                              |
|                     | Sp | Permanent saline/brackish/alkaline marshes/pools                                                                                                                             |
|                     | Ss | Seasonal/intermittent saline/brackish/alkaline marshes/ pools*                                                                                                               |
|                     | Tp | Permanent freshwater marshes/pools; ponds (below 8 ha), marshes and swamps on inorganic soils; with emergent vegetation water-logged for at least most of the growing season |
|                     | Ts | Seasonal/intermittent freshwater marshes/pools on inorganic soil; includes sloughs, potholes, seasonally flooded meadows, sedge marshes*                                     |
|                     | U  | Non-forested peatlands; includes shrub or open bogs, swamps, fens                                                                                                            |
|                     | Va | Alpine wetlands; includes alpine meadows, temporary waters from snowmelt                                                                                                     |
|                     | Vt | Tundra wetlands; includes tundra pools, temporary waters from snowmelt                                                                                                       |
|                     | W  | Shrub-dominated wetlands; Shrub swamps, shrub-dominated freshwater marsh, shrub carr, alder thicket; on inorganic soils*                                                     |
|                     | Xf | Freshwater, tree-dominated wetlands; includes freshwater swamp forest, seasonally flooded forest, wooded swamps; on inorganic soils*                                         |
|                     | Xp | Forested peatlands; peat swamp forest*                                                                                                                                       |
|                     | Y  | Freshwater springs; oases                                                                                                                                                    |
|                     | Zg | Geothermal wetlands                                                                                                                                                          |
|                     | Zk | Subterranean karst and cave hydrological systems                                                                                                                             |
| Human-made wetlands | 1  | Aquaculture ( <i>e.g.</i> fish/shrimp) ponds                                                                                                                                 |
|                     | 2  | Ponds; includes farm ponds, stock ponds, small tanks; (generally below 8 ha)                                                                                                 |
|                     | 3  | Irrigated land; includes irrigation channels and rice fields                                                                                                                 |
|                     | 4  | Seasonally flooded agricultural land**                                                                                                                                       |
|                     | 5  | Salt exploitation sites; salt pans, salines, etc.                                                                                                                            |
|                     | 6  | Water storage areas; reservoirs/barrages/dams/impoundments; (generally over 8 ha)                                                                                            |
|                     | 7  | Excavations; gravel/brick/clay pits; borrow pits, mining pools                                                                                                               |
|                     | 8  | Wastewater treatment areas; sewage farms, settling ponds, oxidation basins                                                                                                   |

**References:**

1. Ramsar Convention Secretariat *The Ramsar Convention Manual: A Guide to the Convention on Wetlands (Ramsar, Iran, 1971)*; Ramsar Convention Secretariat: Gland, Switzerland, 2006;
